# Supplementary material for: Discovery of Oleaginous Yeast from Mountain Forest Soil in Thailand
Source: MDPI journal article supplement (doi:10.3390/jof8101100), 2022-10-18
Supplement: s1 [file s1]

## Supplementary Data

**Table S1.** Sampling location, physical properties of soil in the sampling sites and yeast isolated by NDM-agar and NDM-gellan gum.

| Sampling location | Soil conditions |              |     | Number of strains |                | Total of strains |
|-------------------|-----------------|--------------|-----|-------------------|----------------|------------------|
|                   | Temp. (C°)      | Humidity (%) | pH  | NDM-agar          | NDM-gellan gum |                  |
| Sample 1          | 20              | 15           | 6.5 | 1                 | -              | 1                |
| Sample 2          | 21              | 15           | 7.0 | 1                 | 1              | 2                |
| Sample 3          | 22              | 15           | 7.0 | 1                 | -              | 1                |
| Sample 4          | 15              | 18           | 7.0 | 1                 | -              | 1                |
| Sample 5          | 18              | 20           | 7.0 | 1                 | 6              | 7                |
| Sample 6          | 20              | 30           | 6.5 | 3                 | 5              | 8                |
| Sample 7          | 25              | 15           | 7.0 | 1                 | 5              | 6                |
| Sample 8          | 18              | 30           | 7.5 | 4                 | 2              | 6                |
| Sample 9          | 18              | 20           | 7.0 | 12                | 12             | 24               |
| Sample 10         | 19              | 30           | 8.5 | -                 | 5              | 5                |
| Sample 11         | 19              | 30           | 4.0 | 3                 | 1              | 4                |
| Sample 12         | 19              | 45           | 6.0 | 2                 | 1              | 3                |
| Sample 13         | 19              | 30           | 6.5 | 1                 | 1              | 2                |
| Sample 14         | 18              | 40           | 7.0 | -                 | 3              | 3                |
| Sample 15         | 19              | 40           | 7.0 | 1                 | -              | 1                |
| Sample 16         | 19              | 30           | 6.5 | 4                 | -              | 4                |
| Sample 17         | 20              | 20           | 7.0 | 1                 | 8              | 9                |
| Sample 18         | 19              | 45           | 6.5 | 2                 | -              | 2                |
| Sample 19         | 18              | 15           | 7.0 | 4                 | 1              | 5                |
| Sample 20         | 19              | 15           | 7.0 | 2                 | 1              | 3                |
| Sample 21         | 18              | 15           | 6.5 | 11                | 13             | 24               |
| Sample 22         | 15              | 19           | 7.0 | -                 | 6              | 6                |
| Total             |                 |              |     | 56                | 71             | 127              |

**Table S2.** Lipid accumulation of yeast isolated cultivated in 50 mL of 2G2M broth containing 20 g L<sup>-1</sup> glucose on rotary shaker at 150 rpm and 30°C for 7 d.

| Yeast species                    | Strain          | Biomass<br>(g L <sup>-1</sup> ) | Lipid<br>(g L <sup>-1</sup> ) | Lipid content<br>(% of dry biomass) |
|----------------------------------|-----------------|---------------------------------|-------------------------------|-------------------------------------|
| <i>Lipomyces tetrasporus</i>     | SWU-NGP 2-5     | 1.49±0.05                       | 1.10±0.06                     | 74.26±6.30                          |
| <i>Lipomyces tetrasporus</i>     | SWU-NAP 4-1     | 4.50±0.08                       | 2.57±0.04                     | 57.10±1.82                          |
| <i>Lipomyces mesembrius</i>      | SWU-NGP 14-6    | 9.13±0.36                       | 5.20±0.03                     | 57.10±1.89                          |
| <i>Lipomyces mesembrius</i>      | SWU-NGP 6-4     | 7.83±0.17                       | 3.98±0.02                     | 50.80±0.80                          |
| <i>Lipomyces tetrasporus</i>     | SWU-NGP 5-8-1   | 9.07±0.16                       | 4.27±0.01                     | 47.06±0.66                          |
| <i>Saitozyma podzolica</i>       | SWU-NAP 5-4-2   | 3.88±0.19                       | 1.81±0.19                     | 46.63±2.51                          |
| <i>Lipomyces starkeyi</i>        | SWU-NGP 14-3-1  | 3.53±0.56                       | 1.47±0.07                     | 42.49±4.65                          |
| <i>Lipomyces starkeyi</i>        | SWU-NGTP 4-5    | 5.92±0.14                       | 2.45±0.22                     | 41.56±4.67                          |
| <i>Lipomyces starkeyi</i>        | SWU-NGP 5-7     | 8.39±0.85                       | 3.35±0.002                    | 40.30±4.11                          |
| <i>Cyberlindnera saturnus</i>    | SWU-NGTP 5-3-3  | 1.00±0.04                       | 0.4±0.014                     | 40.00±0.00                          |
| <i>Saitozyma podzolica</i>       | SWU-NGP 5-3-8   | 6.59±0.89                       | 2.63±0.35                     | 40.00±0.00                          |
| <i>Papiliotrema flavescens</i>   | SWU-NGTP 4-1    | 1.87±0.24                       | 0.74±0.10                     | 40.00±0.00                          |
| <i>Saitozyma podzolica</i>       | SWU-NGP 14-2-2  | 4.99±0.19                       | 1.99±0.07                     | 40.00±0.00                          |
| <i>Meyerozyma guilliermondii</i> | SWU-NATP 2-4    | 0.25±0.04                       | 0.10±0.02                     | 40.00±0.00                          |
| <i>Papiliotrema flavescens</i>   | SWU-NATP 3-3    | 1.15±0.06                       | 0.46±0.02                     | 40.00±0.00                          |
| <i>Lipomyces starkeyi</i>        | SWU-NGTP 4-3    | 6.03±0.15                       | 2.40±0.18                     | 39.69±2.00                          |
| <i>Papiliotrema terrestris</i>   | SWU-NAP 12-1-1  | 3.46±0.04                       | 1.34±0.25                     | 38.76±7.80                          |
| <i>Lipomyces mesembrius</i>      | SWU-NAP 3-4     | 8.40±0.20                       | 3.25±0.33                     | 38.64±3.03                          |
| <i>Lipomyces starkeyi</i>        | SWU-NATP 4-2    | 2.93±0.09                       | 1.13±0.13                     | 38.60±5.62                          |
| <i>Saitozyma podzolica</i>       | SWU-NGP 5-3-2-1 | 2.42±0.02                       | 0.92±0.05                     | 38.00±1.89                          |
| <i>Lipomyces mesembrius</i>      | SWU-NAP 8-4     | 7.88±0.02                       | 2.86±0.12                     | 36.32±1.59                          |
| <i>Lipomyces mesembrius</i>      | SWU-NGP 14-8    | 9.87±0.05                       | 3.54±0.10                     | 35.92±0.85                          |
| <i>Lipomyces starkeyi</i>        | SWU-NGTP 5-7    | 9.50±0.46                       | 3.38±0.09                     | 35.71±2.66                          |
| <i>Lipomyces starkeyi</i>        | SWU-NGP 6-6     | 4.88±0.11                       | 1.71±0.13                     | 35.04±3.45                          |
| <i>Lipomyces mesembrius</i>      | SWU-NATP 1-4    | 2.42±0.01                       | 0.84±0.29                     | 34.68±11.77                         |
| <i>Lipomyces tetrasporus</i>     | SWU-NAP 9-2     | 8.82±0.17                       | 2.95±0.54                     | 33.32±5.48                          |
| <i>Papiliotrema terrestris</i>   | SWU-NAPui 12-9  | 5.99±0.38                       | 1.96±0.36                     | 32.57±3.97                          |
| <i>Lipomyces tetrasporus</i>     | SWU-NAP 13-8    | 7.60±0.90                       | 2.39±0.15                     | 32.14±5.83                          |
| <i>Lipomyces starkeyi</i>        | SWU-NATP 2-6    | 5.22±0.15                       | 1.66±0.08                     | 31.91±2.41                          |
| <i>Saitozyma podzolica</i>       | SWU-NGP 5-3-2   | 7.35±0.13                       | 2.33±0.11                     | 31.71±0.90                          |
| <i>Lipomyces starkeyi</i>        | SWU-NAP 13-4    | 9.93±0.22                       | 3.12±0.07                     | 31.47±1.36                          |
| <i>Lipomyces tetrasporus</i>     | SWU-NAP 5-2-2   | 2.76±0.21                       | 0.86±0.14                     | 30.94±2.71                          |
| <i>Lipomyces tetrasporus</i>     | SWU-NAP 5-3-1-1 | 8.69±0.85                       | 2.76±1.26                     | 30.59±11.51                         |
| <i>Saitozyma podzolica</i>       | SWU-YGP 8-1-2   | 3.30±0.00                       | 0.97±0.19                     | 29.33±5.81                          |
| <i>Lipomyces tetrasporus</i>     | SWU-NATP 2-12   | 3.58±0.42                       | 1.01±0.15                     | 28.98±7.48                          |
| <i>Lipomyces starkeyi</i>        | SWU-NGP 14-9    | 6.27±0.04                       | 1.80±0.01                     | 28.68±0.09                          |
| <i>Lipomyces starkeyi</i>        | SWU-NGTP 4-8    | 8.42±0.24                       | 2.38±0.02                     | 28.23±0.52                          |
| <i>Papiliotrema terrestris</i>   | SWU-NAP 12-1-12 | 7.12±0.48                       | 2.01±0.34                     | 28.06±2.88                          |
| <i>Lipomyces starkeyi</i>        | SWU-NAP 2-2     | 2.12±0.15                       | 0.59±0.03                     | 27.93±0.50                          |
| <i>Lipomyces tetrasporus</i>     | SWU-NAP 5-2-1   | 7.34±0.22                       | 2.04±0.71                     | 27.61±8.90                          |
| <i>Lipomyces starkeyi</i>        | SWU-NGTP 4-11   | 6.63±0.57                       | 1.78±0.09                     | 27.22±3.67                          |

**Table S2.** *Cont.*

| Yeast species                  | Strain          | Biomass<br>(g L <sup>-1</sup> ) | Lipid<br>(g L <sup>-1</sup> ) | Lipid content<br>(% of dry biomass) |
|--------------------------------|-----------------|---------------------------------|-------------------------------|-------------------------------------|
| <i>Lipomyces tetrasporus</i>   | SWU-NGP 6-5     | 3.47±0.17                       | 0.93±0.01                     | 26.94±1.55                          |
| <i>Lipomyces tetrasporus</i>   | SWU-NGP 9-3     | 10.15±0.20                      | 2.73±0.21                     | 26.93±2.62                          |
| <i>Lipomyces tetrasporus</i>   | SWU-NGP 11-1    | 10.95±0.06                      | 2.90±0.13                     | 26.45±1.31                          |
| <i>Lipomyces tetrasporus</i>   | SWU-NGP 3-7     | 8.89±0.11                       | 2.35±0.14                     | 26.44±1.25                          |
| <i>Lipomyces tetrasporus</i>   | SWU-NGP 4-2-2   | 9.37±0.86                       | 2.44±0.17                     | 26.42±4.27                          |
| <i>Lipomyces tetrasporus</i>   | SWU-NGP 2-1-1   | 5.87±0.04                       | 1.54±0.11                     | 26.27±2.07                          |
| <i>Lipomyces tetrasporus</i>   | SWU-NAP 2-1     | 8.87±0.10                       | 2.30±0.08                     | 25.88±0.66                          |
| <i>Lipomyces starkeyi</i>      | SWU-NAPui 2-1   | 1.35±0.08                       | 0.35±0.04                     | 25.83±1.58                          |
| <i>Piskurozyma</i> sp.         | SWU-NATP 4-12   | 2.92±0.24                       | 0.74±0.04                     | 25.45±0.82                          |
| <i>Lipomyces starkeyi</i>      | SWU-NGTP 4-4    | 7.16±1.26                       | 1.81±0.28                     | 25.42±0.62                          |
| <i>Lipomyces tetrasporus</i>   | SWU-NGP 3-6     | 8.81±0.10                       | 2.21±0.08                     | 25.16±1.20                          |
| <i>Saitozyma podzolica</i>     | SWU-NGP 5-10-2  | 1.71±0.12                       | 0.42±0.01                     | 24.54±2.12                          |
| <i>Lipomyces starkeyi</i>      | SWU-NAP 8-1     | 8.60±0.58                       | 2.11±0.20                     | 24.49±0.65                          |
| <i>Lipomyces mesembrius</i>    | SWU-NATP 4-13   | 2.72±0.19                       | 0.66±0.05                     | 24.15±0.12                          |
| <i>Lipomyces starkeyi</i>      | SWU-NATP 4-5    | 6.78±0.11                       | 1.60±0.13                     | 23.62±1.53                          |
| <i>Papiliotrema flavescens</i> | SWU-YGPui 12-1  | 5.81±1.51                       | 1.25±0.06                     | 23.43±7.18                          |
| <i>Lipomyces mesembrius</i>    | SWU-NATP 4-11   | 3.59±0.25                       | 0.83±0.02                     | 23.32±2.07                          |
| <i>Cyberlindnera saturnus</i>  | SWU-NATP 4-4    | 3.65±0.55                       | 0.81±0.07                     | 22.94±5.32                          |
| <i>Papiliotrema flavescens</i> | SWU-NAP1-4      | 8.11±0.10                       | 1.85±0.08                     | 22.86±1.21                          |
| <i>Lipomyces tetrasporus</i>   | SWU-NGP 2-6-2   | 2.31±0.14                       | 0.53±0.05                     | 22.86±0.74                          |
| <i>Lipomyces starkeyi</i>      | SWU-NAPH 3-6    | 3.93±0.31                       | 0.9±0.018                     | 22.62±2.73                          |
| <i>Lipomyces tetrasporus</i>   | SWU-NATP 9-2    | 7.57±0.06                       | 1.69±0.19                     | 22.38±2.35                          |
| <i>Lipomyces mesembrius</i>    | SWU-NAP 8-2     | 5.37±0.15                       | 1.19±0.01                     | 22.13±0.86                          |
| <i>Lipomyces tetrasporus</i>   | SWU-NAP 5-5     | 2.86±0.17                       | 0.62±0.01                     | 21.87±1.47                          |
| <i>Lipomyces tetrasporus</i>   | SWU-NGP 2-2     | 6.15±0.75                       | 1.33±0.12                     | 21.77±0.75                          |
| <i>Hannaella</i> sp.           | SWU-YGP 11-1    | 1.70±0.15                       | 0.36±0.08                     | 21.69±6.69                          |
| <i>Lipomyces tetrasporus</i>   | SWU-NGP 2-3     | 7.89±0.05                       | 1.70±0.04                     | 21.54±0.42                          |
| <i>Lipomyces starkeyi</i>      | SWU-NGP 5-3-3   | 6.52±0.17                       | 1.39±0.16                     | 21.44±3.00                          |
| <i>Lipomyces tetrasporus</i>   | SWU-NAP 6-1     | 6.15±0.64                       | 1.31±0.14                     | 21.28±0.08                          |
| <i>Lipomyces tetrasporus</i>   | SWU-NAP 5-6     | 3.24±0.92                       | 0.66±0.09                     | 21.18±2.62                          |
| <i>Lipomyces tetrasporus</i>   | SWU-NGP 1-3     | 8.90±0.91                       | 1.85±0.18                     | 20.85±0.13                          |
| <i>Papiliotrema flavescens</i> | SWU-NGTP 3-2    | 3.45±0.05                       | 0.72±0.03                     | 20.83±0.71                          |
| <i>Lipomyces tetrasporus</i>   | SWU-NGTP 4-2    | 2.10±0.06                       | 0.43±0.03                     | 20.65±0.65                          |
| <i>Lipomyces tetrasporus</i>   | SWU-NAP 4-2-1   | 8.27±0.32                       | 1.68±0.64                     | 20.60±8.54                          |
| <i>Lipomyces starkeyi</i>      | SWU-NGTP 4-12-1 | 5.29±0.04                       | 1.08±0.19                     | 20.48±3.82                          |
| <i>Lipomyces tetrasporus</i>   | SWU-NAP 2-3     | 7.89±0.14                       | 1.60±0.02                     | 20.23±0.16                          |
| <i>Cyberlindnera saturnus</i>  | SWU-NGTP 4-12-2 | 1.98±0.16                       | 0.40±0.01                     | 20.13±0.97                          |
| <i>Cyberlindnera saturnus</i>  | SWU-NGTP 4-14-2 | 1.76±0.06                       | 0.35±0.06                     | 19.92±4.32                          |
| <i>Lipomyces tetrasporus</i>   | SWU-NAP 5-3-3   | 5.46±0.34                       | 1.07±0.16                     | 19.87±4.19                          |
| <i>Lipomyces tetrasporus</i>   | SWU-NAP 5-4     | 7.44±0.00                       | 1.46±0.03                     | 19.65±0.40                          |
| <i>Lipomyces tetrasporus</i>   | SWU-NGP 5-9-2   | 8.19±0.25                       | 1.59±0.05                     | 19.40±1.15                          |
| <i>Lipomyces mesembrius</i>    | SWU-NATP 4-8    | 6.63±0.62                       | 1.26±0.03                     | 19.07±1.30                          |

Table S2. Cont.

| Yeast species                   | Strain          | Biomass<br>(g L <sup>-1</sup> ) | Lipid<br>(g L <sup>-1</sup> ) | Lipid content<br>(% of dry biomass) |
|---------------------------------|-----------------|---------------------------------|-------------------------------|-------------------------------------|
| <i>Lipomyces tetrasporus</i>    | SWU-NAP 5-4-1   | 9.56±0.22                       | 1.80±0.18                     | 18.84±1.45                          |
| <i>Lipomyces starkeyi</i>       | SWU-NATP 1-1    | 5.82±0.80                       | 1.08±0.21                     | 18.36±1.15                          |
| <i>Lipomyces starkeyi</i>       | SWU-NAP 14-4    | 2.28±0.13                       | 0.40±0.07                     | 17.87±4.09                          |
| <i>Lipomyces starkeyi</i>       | SWU-NATP 4-3    | 5.45±0.26                       | 0.95±0.10                     | 17.61±2.66                          |
| <i>Lipomyces tetrasporus</i>    | SWU-NGP 4-14    | 9.48±0.24                       | 1.66±0.15                     | 17.55±1.98                          |
| <i>Lipomyces tetrasporus</i>    | SWU-NGP 10-3    | 8.37±0.12                       | 1.46±0.04                     | 17.44±0.69                          |
| <i>Lipomyces tetrasporus</i>    | SWU-NGP 11-2    | 9.33±0.03                       | 1.62±0.10                     | 17.39±1.11                          |
| <i>Papiliotrema flavescens</i>  | SWU-NAP 3-2     | 1.66±0.50                       | 0.29±0.09                     | 17.32±0.08                          |
| <i>Lipomyces starkeyi</i>       | SWU-NGP 5-10-8  | 6.75±0.12                       | 1.16±0.20                     | 17.15±2.73                          |
| <i>Lipomyces tetrasporus</i>    | SWU-NGP 5-3-1   | 8.82±0.02                       | 1.49±0.01                     | 16.95±0.18                          |
| <i>Lipomyces starkeyi</i>       | SWU-NGP 1-5-4   | 0.9±0.11                        | 0.15±0.03                     | 16.85±1.15                          |
| <i>Papiliotrema flavescens</i>  | SWU-NATP 2-7    | 6.23±0.28                       | 1.03±0.02                     | 16.63±1.12                          |
| <i>Hannaella</i> sp.            | SWU-NAPS 5-1    | 6.41±0.65                       | 1.06±0.15                     | 16.46±0.72                          |
| <i>Lipomyces starkeyi</i>       | SWU-NGTP 4-12-3 | 4.83±0.83                       | 0.79±0.14                     | 16.40±0.002                         |
| <i>Lipomyces tetrasporus</i>    | SWU-NGP 1-1     | 8.44±0.06                       | 1.38±0.09                     | 16.32±1.00                          |
| <i>Lipomyces starkeyi</i>       | SWU-NAP 10-1    | 3.52±0.27                       | 0.58±0.09                     | 16.31±1.42                          |
| <i>Lipomyces starkeyi</i>       | SWU-NATP 3-1    | 4.63±0.04                       | 0.74±0.02                     | 15.92±0.55                          |
| <i>Lipomyces tetrasporus</i>    | SWU-NGP 3-1     | 6.82±0.05                       | 1.07±0.01                     | 15.63±0.03                          |
| <i>Papiliotrema flavescens</i>  | SWU-NGTP 2-6    | 6.00±0.74                       | 0.86±0.04                     | 14.47±1.12                          |
| <i>Piskurozyma</i> sp.          | SWU-NGP 14-3-2  | 0.53±0.15                       | 0.07±0.01                     | 14.12±5.88                          |
| <i>Lipomyces tetrasporus</i>    | SWU-NAP 5-1-2   | 3.46±0.44                       | 0.49±0.13                     | 14.00±1.94                          |
| <i>Lipomyces tetrasporus</i>    | SWU-NGP 5-6-1   | 5.35±0.34                       | 0.73±0.05                     | 13.85±1.88                          |
| <i>Papiliotrema terrestris</i>  | SWU-NAPui 14-5  | 8.25±1.15                       | 1.15±0.28                     | 13.70±1.53                          |
| <i>Rhodotorula mucilaginosa</i> | SWU-NGP 14-3-3  | 6.04±0.11                       | 0.82±0.06                     | 13.64±0.69                          |
| <i>Lipomyces tetrasporus</i>    | SWU-NAP 5-3-1-2 | 5.73±0.23                       | 0.74±0.20                     | 12.76±2.94                          |
| <i>Lipomyces starkeyi</i>       | SWU-NGP 14-1    | 6.95±1.04                       | 0.89±0.19                     | 12.72±0.87                          |
| <i>Lipomyces tetrasporus</i>    | SWU-NGP 1-4     | 8.51±0.03                       | 1.07±0.05                     | 12.58±0.67                          |
| <i>Lipomyces starkeyi</i>       | SWU-NGTP 4-6    | 4.95±0.02                       | 0.60±0.07                     | 12.18±1.53                          |
| <i>Piskurozyma</i> sp.          | SWU-NGP 14-3-4  | 0.67±0.01                       | 0.08±0.01                     | 11.72±0.81                          |
| <i>Lipomyces tetrasporus</i>    | SWU-NGP 6-3     | 8.72±0.20                       | 0.96±0.04                     | 11.06±0.30                          |
| <i>Lipomyces starkeyi</i>       | SWU-NGTP 5-8    | 5.52±0.01                       | 0.60±0.14                     | 10.88±2.62                          |
| <i>Lipomyces tetrasporus</i>    | SWU-NGP 4-4     | 7.17±0.20                       | 0.78±0.12                     | 10.78±1.43                          |
| <i>Papiliotrema flavescens</i>  | SWU-NATP 4-15   | 6.54±0.75                       | 0.68±0.01                     | 10.50±1.39                          |
| <i>Saitozyma podzolica</i>      | SWU-NGP 5-4-2   | 5.13±0.08                       | 0.52±0.14                     | 10.06±2.53                          |
| <i>Lipomyces tetrasporus</i>    | SWU-NAP 13-7    | 5.97±0.04                       | 0.58±0.04                     | 9.75±0.64                           |
| <i>Cyberlindnera saturnus</i>   | SWU-NATP 4-6    | 3.70±0.20                       | 0.34±0.23                     | 8.81±5.85                           |
| <i>Lipomyces tetrasporus</i>    | SWU-NGP5-4-1    | 2.48±0.28                       | 0.20±0.02                     | 8.33±1.67                           |
| <i>Papiliotrema flavescens</i>  | SWU-NGTP 2-5    | 9.43±0.42                       | 0.68±0.13                     | 7.33±1.72                           |
| <i>Cyberlindnera saturnus</i>   | SWU-NGP 1-5-2-1 | 3.08±0.02                       | 0.22±0.003                    | 7.30±0.01                           |
| <i>Cyberlindnera saturnus</i>   | SWU-NGTP 4-14-3 | 2.73±0.01                       | 0.19±0.01                     | 6.81±0.19                           |
| <i>Lipomyces tetrasporus</i>    | SWU-NGP 3-2     | 3.45±0.15                       | 0.21±0.07                     | 5.96±1.71                           |
| <i>Lipomyces tetrasporus</i>    | SWU-NGTP 5-3-2  | 9.16±0.01                       | 0.54±0.01                     | 5.90±0.12                           |

**Table S2.** *Cont.*

| Yeast species                  | Strain        | Biomass<br>(g L <sup>-1</sup> ) | Lipid<br>(g L <sup>-1</sup> ) | Lipid content<br>(% of dry biomass) |
|--------------------------------|---------------|---------------------------------|-------------------------------|-------------------------------------|
| <i>Naganishia diffluens</i>    | SWU-NGP 1-5-1 | 2.72±0.00                       | 0.15±0.01                     | 5.64±0.00                           |
| <i>Cystobasidium slooffiae</i> | SWU-NAP 4-2-2 | 6.35±1.68                       | 0.31±0.03                     | 5.10±0.81                           |
