# Supplementary material for: Discovery of Oleaginous Yeast from Mountain Forest Soil in Thailand
Source: MDPI journal article supplement (doi:10.3390/jof8101100), 2022-10-18
Supplement: s1 [file s1]

## Supplementary Data 2

### The D1/D2 domain of the LSU rRNA gene sequence

#### 1. *Lipomyces starkeyi* SWU-NGTP 4-8

>SWU-NGTP 4-8 (567 bp)

AAACCAACAGGGATTGCCTTAGTAACTGCGAGTGAAGCGGCAAGAGCTCAAATT  
TGAAATCTGGCACCTTCGGTGTCCGAGTTGTAATTTGTAGAAGCATCTTTTGGATT  
GGTCCTTGCATATGTTCCCTTGAACAGGACATCATAGAGGGTGAGAATCCCGTTC  
ATGGTGGGGAATCCAATTCTTTGTAAAGTGCTTTCGAAGAGTCGAGTTGTTTGGGA  
ATGCAGCTCTAAGTGGGTGGTAAATTCCATCTAAAGCTAAATATTGGCGAGAGAC  
CGATAGCGAACAAGTACAGTGATGGAAAGATGAAAAGAACTCCGAAAGGAGAG  
TGAAAAAGGACGTGAAATTGTTGAAAGGGAAGTGCTTGAGATCAGTCTTAAGGT  
TTAGTGATCAGTCTTCCTTTTGGTTGGTGCCTCACTATTTCTTAGGCCAACATCAG  
TTTTGGCGGCAGGATAATGACATTGGAATGTGGCTCTTTCGGGAGTGTTATAGCCT  
TTGTTGATACTGCCTGCTTAGACTGAGGACTGCGCTTTTGCTAGGATGTTGGCATA  
ATGATCTTAAGCAGC

#### 2. *Lipomyces tetrasporus* SWU-NGP 5-3-1

>SWU-NGP 5-3-1 (561 bp)

AAACCAACAGGGATTGCCTTAGTAACTGCGAGTGAAGCGGCAAGAGCTCAAATT  
TGAAATCTGGCACCTTCGGTGTCCGAGTTGTAATTTGTAGAAGCATCTTTTGGATT  
GGTCCTTGCATATGTTCCCTTGAACAGGACATCATAGAGGGTGAGAATCCCGTTC  
ATGGTGGGGAATCCAATTCTTTGTAAAGTGCTTTCGAAGAGTCGAGTTGTTTGGGA  
ATGCAGCTCTAAGTGGGTGGTAAATTCCATCTAAAGCTAAATATTGGCGAGAGAC  
CGATAGCGAACAAGTACAGTGATGGAAAGATGAAAAGAACTCCGAAAGGAGAG  
TGAAAAAGGACGTGAAATTGTTGAAAGGGAAGTGCTTGAGATCAGTCTTAAGGT  
TTAGTGATCAGTCTTCCTTTTGGTTGGTGCCTCACTATTTCTTAGGCCAACATCAG  
TTTTCGCGGCAGGATAATGACATTGGAATGTGGCTCTTTCGGGAGTGTTATAGCCT  
TTGTTGATACTGCCTGCTTAGACTGAGGACCGCGCTTTTGCTAGGATGTTGGCATA  
ATGATCTTA

### 3. *Lipomyces tetrasporus* SWU-NGP 10-3

>SWU-NGP 10-3 (567 bp)

AAACCAACAGGGATTGCCTTAGTAACTGCGAGTGAAGCGGCAAGAGCTCAAATT  
TGAAATCTGGCACCTTCGGTGTCCGAGTTGTAATTTGTAGAAGCATCTTTTGGATT  
GGTCCTTGCATATGTTTCCTTGGAAACAGGACATCATAGAGGGTGAGAATCCCGTTC  
ATGGTGGGGAATCCAATTCTTTGTAAAGTGCTTTCGAAGAGTCGAGTTGTTTGGGA  
ATGCAGCTCTAAGTGGGTGGTAAATTCCATCTAAAGCTAAATATTGGCGAGAGAC  
CGATAGCGAACAAGTACAGTGATGGAAAGATGAAAAGAACTCCGAAAGGAGAG  
TGAAAAAGGACGTGAAATTGTTGAAAGGGAAGTGCTTGAGATCAGTCTTAAGGT  
TTAGTGATCAGTCTTCCTTTTGGTTGGTGCCTCACTATTTCTTAGGCCAACATCAG  
TTTTCGCGGCAGGATAATGACATTGGAATGTGGCTCTTTCGGGAGTGTTATAGCCT  
TTGTTGATACTGCCTGCTTAGACTGAGGACCGCGCTTTTGCTAGGATGTTGGCATA  
ATGATCTTAAGCAGC

### 4. *Lipomyces tetrasporus* SWU-NGP 5-8-1

>SWU-NGP 5-8-1 (567 bp)

AAACCAACAGGGATTGCCTTAGTAACTGCGAGTGAAGCGGCAAGAGCTCAAATT  
TGAAATCTGGCACCTTCGGTGTCCGAGTTGTAATTTGTAGAAGCATCTTTTGGATT  
GGTCCTTGCATATGTTTCCTTGGAAACAGGACATCATAGAGGGTGAGAATCCCGTTC  
ATGGTGGGGAATCCAATTCTTTGTAAAGTGCTTTCGAAGAGTCGAGTTGTTTGGGA  
ATGCAGCTCTAAGTGGGTGGTAAATTCCATCTAAAGCTAAATATTGGCGAGAGAC  
CGATAGCGAACAAGTACAGTGATGGAAAGATGAAAAGAACTCCGAAAGGAGAG  
TGAAAAAGGACGTGAAATTGTTGAAAGGGAAGTGCTTGAGATCAGTCTTAAGGT  
TTAGTGATCAGTCTTCCTTTTGGTTGGTGCCTCACTATTTCTTAGGCCAACATCAG  
TTTTCGCGGCAGGATAATGACATTGGAATGTGGCTCTTTCGGGAGTGTTATAGCCT  
TTGTTGATACTGCCTGCTTAGACTGAGGACCGCGCTTTTGCTAGGATGTTGGCATA  
ATGATCTTAAGCAGC

### 5. *Lipomyces tetrasporus* SWU-NGP 11-2

>SWU-NGP 11-2 (567 bp)

AAACCAACAGGGATTGCCTTAGTAACTGCGAGTGAAGCGGCAAGAGCTCAAATT  
TGAAATCTGGCACCTTCGGTGTCCGAGTTGTAATTTGTAGAAGCATCTTTTGGATT  
GGTCCTTGCATATGTTTCCTTGGAAACAGGACATCATAGAGGGTGAGAATCCCGTTC  
ATGGTGGGGAATCCAATTCTTTGTAAAGTGCTTTCGAAGAGTCGAGTTGTTTGGGA

ATGCAGCTCTAAGTGGGTGGTAAATTCCATCTAAAGCTAAATATTGGCGAGAGAC  
CGATAGCGAACAAGTACAGTGATGGAAAGATGAAAAGAACTCCGAAAGGAGAG  
TGAAAAAGGACGTGAAATTGTTGAAAGGGAAGTGCTTGAGATCAGTCTTAAGGT  
TTAGTGATCAGTCTTCCTTTTGGTTGGTGCCTCACTATTTCTTAGGCCAACATCAG  
TTTTCGCGGCAGGATAATGACATTGGAATGTGGCTCTTTTCGGGAGTGTTATAGCCT  
TTGTTGATACTGCCTGCTTAGACTGAGGACCGCGCTTTTGCTAGGATGTTGGCATA  
ATGATCTTAAGCAGC

**6. *Lipomyces mesembrius* SWU-NGP 14-6**

>SWU-NGP 14-6 (567 bp)

AAACCAACAGGGATTGCCTTAGTAAGTGCAGTGAAAGCGGCAAGAGCTCAAATT  
TGAAATCTGGCACCTTCGGTGTCCGAGTTGTAATTTGTAGAAGCATCTTTTGGATT  
GGTCCTTGCATATGTTTCCTTGAACAGGACATCATAGAGGGTGAGAATCCCGTTC  
ATGGTGGGGAATCCAATTCTTTGTAAAGTGCTTTCGAAGAGTCGAGTTGTTTGGGA  
ATGCAGCTCTAAGTGGGTGGTAAATTCCATCTAAAGCTAAATATTGGCGAGAGAC  
CGATAGCGAACAAGTACAGTGATGGAAAGATGAAAAGAACTCCGAAAGGAGAG  
TGAAAAAGGACGTGAAATTGTTGAAAGGGAAGTGCTTGAGATCAGTCTTAAGGT  
TTAGTGATCAGTCTTCCTTTTGGTTGGTGCCTCACTATTTCTTAGGCCAACATCAG  
TTTTGGCGGCAGGATAATGGCATTGGAATGTGGCTCTTTTCGGGAGTGTTATAGCCT  
TTGTTGATACTGCTTGCTTAGACTGAGGACTGCGCTTTTGCTAGGATGTTGGCATA  
ATGATCTTAAGCAGC

**7. *Lipomyces tetrasporus* SWU-NGP 1-3**

>SWU-NGP 1-3 (567 bp)

AAACCAACAGGGATTGCCTTAGTAAGTGCAGTGAAAGCGGCAAGAGCTCAAATT  
TGAAATCTGGCACCTTCGGTGTCCGAGTTGTAATTTGTAGAAGCATCTTTTGGATT  
GGTCCTTGCATATGTTTCCTTGAACAGGACATCATAGAGGGTGAGAATCCCGTTC  
ATGGTGGGGAATCCAATTCTTTGTAAAGTGCTTTCGAAGAGTCGAGTTGTTTGGGA  
ATGCAGCTCTAAGTGGGTGGTAAATTCCATCTAAAGCTAAATATTGGCGAGAGAC  
CGATAGCGAACAAGTACAGTGATGGAAAGATGAAAAGAACTCCGAAAGGAGAG  
TGAAAAAGGACGTGAAATTGTTGAAAGGGAAGTGCTTGAGATCAGTCTTAAGGT  
TTAGTGATCAGTCTTCCTTTTGGTTGGTGCCTCACTATTTCTTAGGCCAACATCAG  
TTTTCGCGGCAGGATAATGACATTGGAATGTGGCTCTTTTCGGGAGTGTTATAGCCT

TTGTTGATACTGCCTGCTTAGACTGAGGACCGCGCTTTTGCTAGGATGTTGGCATA  
ATGATCTTAAGCAGC

**8. *Lipomyces tetrasporus* SWU-NGP 9-3**

>SWU-NGP 9-3 (567 bp)

AAACCAACAGGGATTGCCTTAGTAACTGCGAGTGAAGCGGCAAGAGCTCAAATT  
TGAAATCTGGCACCTTCGGTGTCCGAGTTGTAATTTGTAGAAGCATCTTTTGGATT  
GGTCCTTGCATATGTTTCCTTGGAACAGGACATCATAGAGGGTGAGAATCCCGTTC  
ATGGTGGGGAATCCAATTCTTTGTAAAGTGCTTTCGAAGAGTCGAGTTGTTTGGGA  
ATGCAGCTCTAAGTGGGTGGTAAATTCCATCTAAAGCTAAATATTGGCGAGAGAC  
CGATAGCGAACAAGTACAGTGATGGAAAGATGAAAAGAACTCCGAAAGGAGAG  
TGAAAAAGGACGTGAAATTGTTGAAAGGGAAGTGCTTGAGATCAGTCTTAAGGT  
TTAGTGATCAGTCTTCCTTTTGGTTGGTGCACCTCACTATTTCTTAGGCCAACATCAG  
TTTTCGCGGCAGGATAATGACATTGGAATGTGGCTCTTTCGGGAGTGTTATAGCCT  
TTGTTGATACTGCCTGCTTAGACTGAGGACCGCGCTTTTGCTAGGATGTTGGCATA  
ATGATCTTAAGCAGC

**9. *Lipomyces starkeyi* SWU-NGTP 5-7**

>SWU-NGTP 5-7 (526 bp)

AAGAGCTCAAATTTGAAATCTGGCACCTTCGGTGTCCGAGTTGTAATTTGTAGAA  
GCATCTTTTGGATTGGTCCTTGCATATGTTTCCTTGGAACAGGACATCATAGAGGGT  
GAGAATCCCGTTCATGGTGGGGAATCCAATTCTTTGTAAAGTGCTTTCGAAGAGT  
CGAGTTGTTTGGGAATGCAGCTCTAAGTGGGTGGTAAATTCCATCTAAAGCTAAA  
TATTGGCGAGAGACCGATAGCGAACAAGTACAGTGATGGAAAGATGAAAAGAA  
CTCCGAAAGGAGAGTGAAAAAGGACGTGAAATTGTTGAAAGGGAAGTGCTTGAG  
ATCAGTCTTAAGGTTTAGTGATCAGTCTTCCTTTTGGTTGGTGCACCTCACTATTTCT  
TAGGCCAACATCAGTTTTGGCGGCAGGATAATGACATTGGAATGTGGCTCTTTCG  
GGAGTGTTATAGCCTTTGTTGATACTGCCTGCTTAGACTGAGGACTGCGCTTTTGC  
TAGGATGTTGGCATAATGATCTTAAGCAGC

**10. *Lipomyces tetrasporus* SWU-NGP 11-1**

>SWU-NGP 11-1 (567 bp)

AAACCAACAGGGATTGCCTTAGTAACTGCGAGTGAAGCGGCAAGAGCTCAAATT  
TGAAATCTGGCACCTTCGGTGTCCGAGTTGTAATTTGTAGAAGCATCTTTTGGATT  
GGTCCTTGCATATGTTTCCTTGGAAACAGGACATCATAGAGGGTGAGAATCCCGTTC  
ATGGTGGGGAATCCAATTCTTTGTAAAGTGCTTTCGAAGAGTCGAGTTGTTTGGGA  
ATGCAGCTCTAAGTGGGTGGTAAATTCCATCTAAAGCTAAATATTGGCGAGAGAC  
CGATAGCGAACAAGTACAGTGATGGAAAGATGAAAAGAACTCCGAAAGGAGAG  
TGAAAAAGGACGTGAAATTGTTGAAAGGGAAGTGCTTGAGATCAGTCTTAAGGT  
TTAGTGATCAGTCTTCCTTTTGGTTGGTGCCTCACTATTTCTTAGGCCAACATCAG  
TTTTCGCGGCAGGATAATGACATTGGAATGTGGCTCTTTCGGGAGTGTTATAGCCT  
TTGTTGATACTGCCTGCTTAGACTGAGGACCGCGCTTTTGCTAGGATGTTGGCATA  
ATGATCTTAAGCAGC

**11. *Lipomyces tetrasporus* SWU-NGP 4-2-2**

>SWU-NGP 4-2-2 (560 bp)

AAACCAACAGGGATTGCCTTAGTAACTGCGAGTGAAGCGGCAAGAGCTCAAATT  
TGAAATCTGGCACCTTCGGTGTCCGAGTTGTAATTTGTAGAAGCATCTTTTGGATT  
GGTCCTTGCATATGTTTCCTTGGAAACAGGACATCATAGAGGGTGAGAATCCCGTTC  
ATGGTGGGGAATCCAATTCTTTGTAAAGTGCTTTCGAAGAGTCGAGTTGTTTGGGA  
ATGCAGCTCTAAGTGGGTGGTAAATTCCATCTAAAGCTAAATATTGGCGAGAGAC  
CGATAGCGAACAAGTACAGTGATGGAAAGATGAAAAGAACTCCGAAAGGAGAG  
TGAAAAAGGACGTGAAATTGTTGAAAGGGAAGTGCTTGAGATCAGTCTTAAGGT  
TTAGTGATCAGTCTTCCTTTTGGTTGGTGCCTCACTATTTCTTAGGCCAACATCAG  
TTTTCGCGGCAGGATAATGACATTGGAATGTGGCTCTTTCGGGAGTGTTATAGCCT  
TTGTTGATACTGCCTGCTTAGACTGAGGACCGCGCTTTTGCTAGGATGTTGGCATA  
ATGATCTT

**12. *Lipomyces tetrasporus* SWU-NGP 4-14**

>SWU-NGP 4-14 (486 bp)

AAACCAACAGGGATTGCCTTAGTAACTGCGAGTGAAGCGGCAAGAGCTCAAATT  
TGAAATCTGGCACCTTCGGTGTCCGAGTTGTAATTTGTAGAAGCATCTTTTGGATT  
GGTCCTTGCATATGTTTCCTTGGAAACAGGACATCATAGAGGGTGAGAATCCCGTTC  
ATGGTGGGGAATCCAATTCTTTGTAAAGTGCTTTCGAAGAGTCGAGTTGTTTGGGA

ATGCAGCTCTAAGTGGGTGGTAAATTCCATCTAAAGCTAAATATTGGCGAGAGAC  
CGATAGCGAACAAGTACAGTGATGGAAAGATGAAAAGAACTCCGAAAGGAGAG  
TGAAAAAGGACGTGAAATTGTTGAAAGGGAAGTGCTTGAGATCAGTCTTAAGGT  
TTAGTGATCAGTCTTCCTTTTGGTTGGTGCCTCACTATTTCTTAGGCCAACATCAG  
TTTTCGCGGCAGGATAATGACATTGGAATGTGGCTCTTTCGGGAGT

**13. *Lipomyces starkeyi* SWU-NGTP 5-7-1**

>SWU-NGTP 5-7-1 (485 bp)

TGTCCGAGTTGTAATTTGTAGAAGCATCTTTTGGATTGGTCCTTGCATATGTTTCCTT  
GGAACAGGACATCATAGAGGGTGAGAATCCCGTTTCATGGTGGGGAATCCAATTC  
TTTGTAAGTGCTTTCGAAGAGTCGAGTTGTTTGGGAATGCAGCTCTAAGTGGGTG  
GTAAATTCCATCTAAAGCTAAATATTGGCGAGAGACCGATAGCGAACAAGTACA  
GTGATGGAAAGATGAAAAGAACTCCGAAAGGAGAGTGAAAAAGGACGTGAAAT  
TGTTGAAAGGGAAGTGCTTGAGATCAGTCTTAAGGTTTAGTGATCAGTCTTCCTTT  
TGGTTGGTGCCTCACTATTTCTTAGGCCAACATCAGTTTTGGCGGCAGGATAATG  
ACATTGGAATGTGGCTCTTTCGGGAGTGTTATAGCCTTTGTTGATACTGCCTGCTT  
AGACTGAGGACTGCGCTTTTGCTAGGATGTTGGCATAATGATCTTAAGCAGC

**14. *Lipomyces tetrasporus* SWU-NAP 2-1**

>SWU-NAP 2-1 (567 bp)

AAACCAACAGGGATTGCCTTAGTAACTGCGAGTGAAGCGGCAAGAGCTCAAATT  
TGAAATCTGGCACCTTCGGTGTCCGAGTTGTAATTTGTAGAAGCATCTTTTGGATT  
GGTCCTTGCATATGTTTCCTTGGAACAGGACATCATAGAGGGTGAGAATCCCGTTC  
ATGGTGGGGAATCCAATTCCTTTGTAAAGTGCTTTCGAAGAGTCGAGTTGTTTGGGA  
ATGCAGCTCTAAGTGGGTGGTAAATTCCATCTAAAGCTAAATATTGGCGAGAGAC  
CGATAGCGAACAAGTACAGTGATGGAAAGATGAAAAGAACTCCGAAAGGAGAG  
TGAAAAAGGACGTGAAATTGTTGAAAGGGAAGTGCTTGAGATCAGTCTTAAGGT  
TTAGTGATCAGTCTTCCTTTTGGTTGGTGCCTCACTATTTCTTAGGCCAACATCAG  
TTTTCGCGGCAGGATAATGACATTGGAATGTGGCTCTTTCGGGAGTGTTATAGCCT  
TTGTTGATACTGCCTGCTTAGACTGAGGACCGCGCTTTTGCTAGGATGTTGGCATA  
ATGATCTTAAGCAGC

**15. *Lipomyces mesembrius* SWU-NGP 14-8**

>SWU-NGP 14-8 (567 bp)

AAACCAACAGGGATTGCCTTAGTAACTGCGAGTGAAGCGGCAAGAGCTCAAATT  
TGAAATCTGGCACCTTCGGTGTCCGAGTTGTAATTTGTAGAAGCATCTTTTGGATT  
GGTCCTTGCATATGTTTCCTTGGAAACAGGACATCATAGAGGGTGAGAATCCCGTTC  
ATGGTGGGGAATCCAATTCTTTGTAAAGTGCTTTCGAAGAGTCGAGTTGTTTGGGA  
ATGCAGCTCTAAGTGGGTGGTAAATTCCATCTAAAGCTAAATATTGGCGAGAGAC  
CGATAGCGAACAAGTACAGTGATGGAAAGATGAAAAGAACTCCGAAAGGAGAG  
TGAAAAAGGACGTGAAATTGTTGAAAGGGAAGTGCTTGAGATCAGTCTTAAGGT  
TTAGTGATCAGTCTTCCTTTTGGTTGGTGCCTCACTATTTCTTAGGCCAACATCAG  
TTTTGGCGGCAGGATAATGGCATTGGAATGTGGCTCTTTCGGGAGTGTTATAGCCT  
TTGTTGATACTGCTTGCTTAGACTGAGGACTGCGCTTTTGCTAGGATGTTGGCATA  
ATGATCTTAAGCAGC

**16. *Lipomyces mesembrius* SWU-NGP 6-4**

>SWU-NGP 6-4 (567 bp)

AAACCAACAGGGATTGCCTTAGTAACTGCGAGTGAAGCGGCAAGAGCTCAAATT  
TGAAATCTGGCACCTTCGGTGTCCGAGTTGTAATTTGTAGAAGCATCTTTTGGATT  
GGTCCTTGCATATGTTTCCTTGGAAACAGGACATCATAGAGGGTGAGAATCCCGTTC  
ATGGTGGGGAATCCAATTCTTTGTAAAGTGCTTTCGAAGAGTCGAGTTGTTTGGGA  
ATGCAGCTCTAAGTGGGTGGTAAATTCCATCTAAAGCTAAATATTGGCGAGAGAC  
CGATAGCGAACAAGTACAGTGATGGAAAGATGAAAAGAACTCCGAAAGGAGAG  
TGAAAAAGGACGTGAAATTGTTGAAAGGGAAGTGCTTGAGATCAGTCTTAAGGT  
TTAGTGATCAGTCTTCCTTTTGGTTGGTGCCTCACTATTTCTTAGGCCAACATCAG  
TTTTGGCGGCAGGATAATGACATTGGAATGTGGCTCTTTCGGGAGTGTTATAGCCT  
TTGTTGATACTGCCTGCTTAGACTGAGGACTGCGCTTTTGCTAGGATGTTGGCATA  
ATGATCTTAAGCAGC

**17. *Lipomyces tetrasporus* SWU-NAP 9-2**

>SWU-NAP 9-2 (567 bp)

AAACCAACAGGGATTGCCTTAGTAACTGCGAGTGAAGCGGCAAGAGCTCAAATT  
TGAAATCTGGCACCTTCGGTGTCCGAGTTGTAATTTGTAGAAGCATCTTTTGGATT  
GGTCCTTGCATATGTTTCCTTGGAAACAGGACATCATAGAGGGTGAGAATCCCGTTC  
ATGGTGGGGAATCCAATTCTTTGTAAAGTGCTTTCGAAGAGTCGAGTTGTTTGGGA

ATGCAGCTCTAAGTGGGTGGTAAATTCCATCTAAAGCTAAATATTGGCGAGAGAC  
CGATAGCGAACAAGTACAGTGATGGAAAGATGAAAAGAACTCCGAAAGGAGAG  
TGAAAAAGGACGTGAAATTGTTGAAAGGGAAGTGCTTGAGATCAGTCTTAAGGT  
TTAGTGATCAGTCTTCCTTTTGGTTGGTGCCTCACTATTTCTTAGGCCAACATCAG  
TTTTCGCGGCAGGATAATGACATTGGAATGTGGCTCTTTTCGGGAGTGTTATAGCCT  
TTGTTGATACTGCCTGCTTAGACTGAGGACCGCGCTTTTGCTAGGATGTTGGCATA  
ATGATCTTAAGCAGC

**18. *Lipomyces tetrasporus* SWU-NAP 5-4**

>SWU-NAP 5-4 (567 bp)

AAACCAACAGGGATTGCCTTAGTAAGTGCAGTGGAAGCGGCAAGAGCTCAAATT  
TGAAATCTGGCACCTTCGGTGTCCGAGTTGTAATTTGTAGAAGCATCTTTTGGATT  
GGTCCTTGCATATGTTTCCTTGAACAGGACATCATAGAGGGTGAGAATCCCGTTC  
ATGGTGGGGAATCCAATTCTTTGTAAAGTGCTTTCGAAGAGTCGAGTTGTTTGGGA  
ATGCAGCTCTAAGTGGGTGGTAAATTCCATCTAAAGCTAAATATTGGCGAGAGAC  
CGATAGCGAACAAGTACAGTGATGGAAAGATGAAAAGAACTCCGAAAGGAGAG  
TGAAAAAGGACGTGAAATTGTTGAAAGGGAAGTGCTTGAGATCAGTCTTAAGGT  
TTAGTGATCAGTCTTCCTTTTGGTTGGTGCCTCACTATTTCTTAGGCCAACATCAG  
TTTTCGCGGCAGGATAATGACATTGGAATGTGGCTCTTTTCGGGAGTGTTATAGCCT  
TTGTTGATACTGCCTGCTTAGACTGAGGACCGCGCTTTTGCTAGGATGTTGGCATA  
ATGATCTTAAGCAGC

**19. *Lipomyces tetrasporus* SWU-NGP 3-7**

>SWU-NGP 3-7 (508 bp)

AAACCAACAGGGATTGCCTTAGTAAGTGCAGTGGAAGCGGCAAGAGCTCAAATT  
TGAAATCTGGCACCTTCGGTGTCCGAGTTGTAATTTGTAGAAGCATCTTTTGGATT  
GGTCCTTGCATATGTTTCCTTGAACAGGACATCATAGAGGGTGAGAATCCCGTTC  
ATGGTGGGGAATCCAATTCTTTGTAAAGTGCTTTCGAAGAGTCGAGTTGTTTGGGA  
ATGCAGCTCTAAGTGGGTGGTAAATTCCATCTAAAGCTAAATATTGGCGAGAGAC  
CGATAGCGAACAAGTACAGTGATGGAAAGATGAAAAGAACTCCGAAAGGAGAG  
TGAAAAAGGACGTGAAATTGTTGAAAGGGAAGTGCTTGAGATCAGTCTTAAGGT  
TTAGTGATCAGTCTTCCTTTTGGTTGGTGCCTCACTATTTCTTAGGCCAACATCAG  
TTTTCGCGGCAGGATAATGACATTGGAATGTGGCTCTTTTCGGGAGTGTTATAGCCT  
TTGTTGATACTG



**20. *Lipomyces starkeyi* SWU- NAP 13-4**

>SWU-NAP 13-4 (567 bp)

AAACCAACAGGGATTGCCTTAGTAACTGCGAGTGAAGCGGCAAGAGCTCAAATT  
TGAAATCTGGCACCTTCGGTGTCCGAGTTGTAATTTGTAGAAGCATCTTTTGGATT  
GGTCCTTGCATATGTTTCCTTGAACAGGACATCATAGAGGGTGAGAATCCCGTTC  
ATGGTGGGGAATCCAATTCTTTGTAAAGTGCTTTCGAAGAGTCGAGTTGTTTGGGA  
ATGCAGCTCTAAGTGGGTGGTAAATTCCATCTAAAGCTAAATATTGGCGAGAGAC  
CGATAGCGAACAAGTACAGTGATGGAAAGATGAAAAGAACTCCGAAAGGAGAG  
TGAAAAAGGACGTGAAATTGTTGAAAGGGAAGTGCTTGAGATCAGTCTTAAGGT  
TtagtgatcagTCTTCCTTTTGGTTGGTGCACtCACTATTTCTTAGGCCAACATCAG  
TTTTGGCGGCAGGATAATGACATTGGAATGTGGCTCTTTCGGGAGTGTTATAGCCT  
TTGTTGATACTGCCTGCTTAGACTGAGGACTGCGCTTTTGCTAGGATGTTGGCATA  
ATGATCTTAAGCAGC

**21. *Papiliotrema terrestris* SWU-NAPui 14-5**

>SWU-NAPui 14-5 (596 bp)

AAACTAACAAGGATTCCCCTAGTAACGGCGAGTGAACCGGGAAGAGCTCAAATT  
TGAAATCTGGCGTGCTCAGTGCGTCCGAGTTGTAATCTATAGAGGCGTTTTCCGTG  
CCGGACTGTGTCTAAGTCCCTTGAACAGGGTATCAAAGAGGGTGATAATCCCGT  
ACTTGACACAATGACCGGTGCTCTGTGATACGTCTTCTACGAGTCGAGTTGTTTGG  
GAATGCAGCTCAAAATGGGTGGTGAGTTCCATCTAAAGCTAAATATTGGCGAGA  
GACCGATAGCGAACAAGTACCGTGAGGGAAAGATGAAAAGCACTTTGGAAAGA  
GAGTTAAACAGTACGTGAAATTGTTGAAAGGGAAACGATTGAAGTCAGTCGTGA  
CTGAGAGGCTCAGCCGTTCTGCCGGTGTATTCCCCTCAGTCGGGTCAACATCAG  
TTTTGTTCCGGTGGATAAGGGCAGCTGGAAGGTGGCACCTCCGGGTGTGTTATAGC  
CAGCTGTGCGATACATCGAATGAGACTGAGGAATGCAGCTCGCCTTTATGGCCGG  
GGTTCGCCACGTCCGAGCTTAGGATGTTGACATAATGGCTTTAAACGA

**22. *Cyberlindnera saturnus* SWU-NATP 4-4**

>SWU-NATP 4-4 (574 bp)

AAACCAACAGGGATTGCCTCAGTAACGGCGAGTGAAGCGGCAAAAGCTCAAATT  
TGAAATCTGGTACCTTTGGTGCCCGAGTTGTAATTTGAAGATAGTTTTCTGGTGCT  
GGCCCTTGTCTATGTTTCCTTGAACAGGACGTCACAGAGGGTGAGAATCCCGTCT

GGCGGGGTGTCCAGTGCTTTGTAGATTTCTATCGACGAGTCGAGTTGTTTGGGAAT  
GCAGCTCTAAGTGGGTGGTAAATTCCATCTAAAGCTAAATATTGGCGAGAGACCG  
ATAGCGAACAAGTACAGTGATGGAAAGATGAAAAGAACTTTGAAAAGAGAGTG  
AAAAAGTACGTGAAATTGTTGAAAGGGAAGGGTATTAGATCAGACTTGGTGT  
GTGATTATCTTCCCTTCTTGGGTGTGCACTCGCATTTCACTGGGCCAGCATCGGT  
CGGGTGGTAAGATAATGACATTGGAACGTGGCACTACCTTCGGGTGGTGTGTTAT  
AGCCCTTGTTGATGTTGCCTACCTGGACCGAGGACTGCGGCTTTTGCCTAGGATGC  
TGCGCTAATGATCTAACACCGC

**23. *Piskurozyma* sp. SWU-NATP 4-12**

>SWU-NATP 4-12 (596 pb)

TAACAAGGATTCCCCTAGTAACGGCGAGTGAAGCGGGAAGAGCTCAAATTTGAA  
ATCTGGCGCCCTCAGGACGTCCGAGTTGTAATCTATAGGAACGTTTCCGTGCCG  
GCTCATGTACAAGTCCCTTGGAAACAGGGCGTCATAGAGGGTGAGAATCCCGTACT  
TGACATGAACCCCCGGTGCTCTGTGATACGTCTCCAACGAGTCGAGTTGTTTGGG  
AATGCAGCTCAAAATGGGTGGTAAATTCCATCTAAAGCTAAATATTGGTGTGAGA  
CCGATAGCGAACAAGTACCGTGAGGGAAAGATGAAAAGCACTTTGGAAAGAGA  
GTTAAAAAGTATGTGAAATTGTTGAAAGGGAAACGATTGAAGTCAGTCGTGTCCT  
TCAGATTCAGCTGGTTCTGCCGGTGTATTTCTGTTGGATGGGGTCAACATCAGTTT  
CGGATGCCGGATAAGGGCTGGAGGAAGGTAGTACCCCCGGGTAACTTATAGCC  
TCCTGTCGCATACGGTGACTGGGACTGAGGAACGCAGCTTGCCTTCATGGCCGGG  
GTTGCCCCACGTACAAGCTTAGGATGTTGACATAATGGCTTTAAACGAC

**24. *Papiliotrema flavescens* SWU-NATP 2-7**

>SWU-NATP 2-7 (587 bp)

TAACAAGGATTCCCCTAGTAACGGCGAGTGAACCGGGAAGAGCTCAAATTTGAA  
ATCTGGCGTGCTCAGTGCGTCCGAGTTGTAATCTATAGAGTCGTTTTCCGTGCCGG  
ACTGTGTCCAAGTCCCTTGGAAACAGGGTATCAAAGAGGGTGATAATCCCGTACTT  
GACACAATGACCGGTGCTCTGTGATACGTCTTCTACGAGTCGAGTTGTTTGGGAA  
TGCAGCTCAAAATGGGTGGTGAAGTTCCATCTAAAGCTAAATATTGGCGAGAGACC  
GATAGCGAACAAGTACCGTGAGGGAAAGATGAAAAGCACTTTGGAAAGAGAGT  
TAAACAGTACGTGAAATTGTTAAAAGGGAAACGATTGAAGTCAGTCGTGACTGA  
GAGGCTCAGCCGGTTCTGCCGGTGTATTCCCCTCAGTCGGGTCAACATCAGTTTTG

TTCGGTGGATAAGGGCAGTTGGAAGGTGGCACCCCTCGGGTGTGTTATAGCCAGCT  
GTGCGATACATCGGATGAGACTGAGGAATGCAGCTCGCCTTTATGGCCGGGGTTC  
GCCACGTTTCGAGCTTAGGATGTTGACATAATGGCTTTA

**25. *Lipomyces tetrasporus* NAP 13-8**

>SWU-NAP 13-8 (567 bp)

AAACCAACAGGGATTGCCTTAGTAAGTGCAGAGTGAAGCGGCAAGAGCTCAAATT  
TGAAATCTGGCACCTTCGGTGTCCGAGTTGTAATTTGTAGAAGCATCTTTTGGATT  
GGTCCTTGCATATGTTCCCTTGGAACAGGACATCATAGAGGGTGAGAATCCCGTTC  
ATGGTGGGGAATCCAATTCTTTGTAAAGTGCTTTCGAAGAGTCGAGTTGTTTGGGA  
ATGCAGCTCTAAGTGGGTGGTAAATTCCATCTAAAGCTAAATATTGGCGAGAGAC  
CGATAGCGAACAAGTACAGTGATGGAAAGATGAAAAGAACTCCGAAAGGAGAG  
TGAAAAAGGACGTGAAATTGTTGAAAGGGAAGTGCTTGAGATCAGTCTTAAGGT  
TTAGTGATCAGTCTTCCTTTTGGTTGGTGCCTCACTATTTCTTAGGCCAACATCAG  
TTTTCGCGGCAGGATAATGACATTGGAATGTGGCTCTTTCGGGAGTGTTATAGCCT  
TTGTTGATACTGCCTGCTTAGACTGAGGACCGCGCTTTTGCTAGGATGTTGGCATA  
ATGATCTTAAGCAGC

**26. *Lipomyces mesembrius* SWU-NAP 3-4**

>SWU-NAP 3-4 (567 bp)

AAACCAACAGGGATTGCCTTAGTAAGTGCAGAGTGAAGCGGCAAGAGCTCAAATT  
TGAAATCTGGCACCTTCGGTGTCCGAGTTGTAATTTGTAGAAGCATCTTTTGGATT  
GGTCCTTGCATATGTTCCCTTGGAACAGGACATCATAGAGGGTGAGAATCCCGTTC  
ATGGTGGGGAATCCAATTCTTTGTAAAGTGCTTTCGAAGAGTCGAGTTGTTTGGGA  
ATGCAGCTCTAAGTGGGTGGTAAATTCCATCTAAAGCTAAATATTGGCGAGAGAC  
CGATAGCGAACAAGTACAGTGATGGAAAGATGAAAAGAACTCCGAAAGGAGAG  
TGAAAAAGGACGTGAAATTGTTGAAAGGGAAGTGCTTGAGATCAGTCTTAAGGT  
TTAGTGATCAGTCTTCCTTTTGGTTGGTGCCTCACTATTTCTTAGGCCAACATCAG  
TTTTGGCGGCAGGATAATGACATTGGAATGTGGCTCTTTCGGGAGTGTTATAGCCT  
TTGTTGATACTGCCTGCTTAGACTGAGGACTGCGCTTTTGCTAGGATGTTGGCATA  
ATGATCTTAAGCAGC

**27. *Lipomyces mesembrius* SWU-NAP 8-2**

>SWU-NAP 8-2 (567 bp)

AAACCAACAGGGATTGCCTTAGTAAGTGCAGTGAAGCGGCAAGAGCTCAAATT  
TGAAATCTGGCACCTTCGGTGTCCGAGTTGTAATTTGTAGAAGCATCTTTTGGATT  
GGTCCTTGCATATGTTCCCTTGGAAACAGGACATCATAGAGGGTGAGAATCCCGTTC  
ATGGTGGGGAATCCAATTCCTTTGTAAAGTGCTTTCGAAGAGTCGAGTTGTTTGGGA  
ATGCAGCTCTAAGTGGGTGGTAAATTCCATCTAAAGCTAAATATTGGCGAGAGAC  
CGATAGCGAACAAGTACAGTGATGGAAAGATGAAAAGAACTCCGAAAGGAGAG  
TGAAAAAGGACGTGAAATTGTTGAAAGGGAAGTGCTTGAGATCAGTCTTAAGGT  
TTAGTGATCAGTCTTCCTTTTGGTTGGTGCCTCACTATTTCTTAGGCCAACATCAG  
TTTTGGCGGCAGGATAATGACATTGGAATGTGGCTCTTTCGGGAGTGTTATAGCCT  
TTGTTGATACTGCCTGCTTAGACTGAGGACTGCGCTTTTGCTAGGATGTTGGCATA  
ATGATCTTAAGCAGC

**28. *Saitozyma podzolica* SWU-YGP 8-1-2**

>SWU-YGP 8-1-2 (597 bp)

AAACTAACAAGGATTCCCTTAGTAGCGGCGAGCGAAGCGGGAAGAGCTCAAATT  
TGAAAGCTGGCGTCCTACGGGCGTCCGCATTGTAATCTATAGAGGCGTTTTCTGTG  
CTGGACCGTGTCCAAGTCCCTTGGAAACAGGGTATCAAAGAGGGTGACAATCCCG  
TACTTGACACGACAACCAGTGCTCTGTGATACGTCTTCTACGAGTCGAGTTGTTTG  
GGAATGCAGCTCAAATGGGTGGTGAATTCCATCTAAAGCTAAATATTGGCGAG  
AGACCGATAGCGAACAAGTACCGTGAGGGAAAGATGAAAAGCACTTTGGAAAG  
AGAGTTAAACAGTATGTGAAATTGTTGAAAGGGAACGATGGAGGTCAGTCGTG  
TCTGTGGGATTACAGCCGTCTCTGGCGGTGTACTTCCACAGACGGGTCAACATCA  
GTTTTGGCTGGCGGATAAAGGCAGGAGGAAGGTGGCACCCCCGGGTGTGTTATA  
GCCTCTTGTTGCATACGCTGGCTGAGACTGAGGAATGCAGCTCGCCTTTATGGCC  
GGGGTTCGCCCACGTTTCGAGCTTAGGATGTTGACATAATGGCCTTCAACGAC

**29. *Cyberlindnera saturnus* SWU-NATP 4-6**

>SWU-NATP 4-6 (580 bp)

AAACCAACAGGGATTGCCTCAGTAACGGCGAGTGAAGCGGCAAAAGCTCAAATT  
TGAAATCTGGTACCTTTGGTGCCCGAGTTGTAATTTGAAGATAGTTTTCTGGTGCT  
GGCCCTTGTCTATGTTCCCTTGGAAACAGGACGTCACAGAGGGTGAGAATCCCGTCT  
GGCGGGGTGTCCAGTGCTTTGTAGATTTCTATCGACGAGTCGAGTTGTTTGGGAAT

GCAGCTCTAAGTGGGTGGTAAATTCCATCTAAAGCTAAATATTGGCGAGAGACCG  
ATAGCGAACAAGTACAGTGATGGAAAGATGAAAAGAACTTTGAAAAGAGAGTG  
AAAAAGTACGTGAAATTGTTGAAAGGGAAGGGTATTAGATCAGACTTGGTGTTTT  
GTGATTATCTTCCCTTCTTGGGTGTGCACTCGCATTTCACTGGGCCAGCATCGGTT  
CGGGTGGTAAGATAATGACATTGGAACGTGGCACTACCTTCGGGTGGTGTGTTAT  
AGCCCTTGTTGATGTTGCCTACCTGGACCGAGGACTGCGGCTTTTGCCTAGGATGC  
TGCGTAATGATCTAACACCGC

**30. *Cyberlindnera saturnus* SWU-NGTP 4-14-3**

>SWU-NGTP 4-14-3 (574 bp)

AAACCAACAGGGATTGCCTCAGTAACGGCGAGTGAAGCGGCAAAAGCTCAAATT  
TGAAATCTGGTACCTTTGGTGCCCGAGTTGTAATTTGAAGATAGTTTTCTGGTGCT  
GGCCCTTGTCTATGTTCCCTTGGAAACAGGACGTCACAGAGGGTGAGAATCCCGTCT  
GGCGGGGTGTCCAGTGCTTTGTAGATTTCTATCGACGAGTCGAGTTGTTTGGGAAT  
GCAGCTCTAAGTGGGTGGTAAATTCCATCTAAAGCTAAATATTGGCGAGAGACCG  
ATAGCGAACAAGTACAGTGATGGAAAGATGAAAAGAACTTTGAAAAGAGAGTG  
AAAAAGTACGTGAAATTGTTGAAAGGGAAGGGTATTAGATCAGACTTGGTGTTTT  
GTGATTATCTTCCCTTCTTGGGTGTGCACTCGCATTTCACTGGGCCAGCATCGGTT  
CGGGTGGTAAGATAATGACATTGGAACGTGGCACTACCTTCGGGTGGTGTGTTAT  
AGCCCTTGTTGATGTTGCCTACCTGGACCGAGGACTGCGGCTTTTGCCTAGGATGC  
TGCGTAATGATCTAACACCGC

**31. *Papiliotrema flavescens* SWU-NGTP 3-2**

>SWU-NGTP 3-2 (584 bp)

GATTCCTTAGTAACGGCGAGTGAACCGGGAAGAGCTCAAATTTGAAATCTGGC  
GTGCTCAGTGCGTCCGAGTTGTAATCTATAGAGTCGTTTTCCGTGCCGGACTGTGT  
CCAAGTCCCTTGGAAACAGGGTATCAAAGAGGGTGATAATCCCGTACTTGACACA  
ATGACCGGTGCTCTGTGATACGTCTTCTACGAGTCGAGTTGTTTGGGAATGCAGCT  
CAAATGGGTGGTGAGTTCCATCTAAAGCTAAATATTGGCGAGAGACCGATAGC  
GAACAAGTACCGTGAGGGAAAGATGAAAAGCACTTTGGAAAGAGAGTTAAACA  
GTACGTGAAATTGTTAAAAGGGAACGATTGAAGTCAGTCGTGACTGAGAGGCT  
CAGCCGGTTCTGCCGGTGTATTCCCCTCAGTCGGGTCAACATCAGTTTTGTTCCGT  
GGATAAGGGCAGTTGGAAGGTGGCACCTCGGGTGTGTTATAGCCAGCTGTCGCA

TACATCGGATGAGACTGAGGAATGCAGCTCGCCTTTATGGCCGGGGTTCGCCCAC  
GTTTCGAGCTTAGGATGTTGACATAATGGCTTTAAACG

**32. *Papiliotrema terrestris* SWU-NAPui 12-9**

>SWU-NAPui 12-9 (598 bp)

AAACTAACAAGGATTCCCCTAGTAACGGCGAGTGAACCGGGAAGAGCTCAAATT  
TGAAATCTGGCGTGCTCAGTGCGTCCGAGTTGTAATCTATAGAGGCGTTTTCCGTG  
CCGGACTGTGTCTAAGTCCCTTGGAACAGGGTATCAAAGAGGGTGATAATCCCGT  
ACTTGACACAATGACCGGTGCTCTGTGATACGTCTTCTACGAGTCGAGTTGTTTGG  
GAATGCAGCTCAAAATGGGTGGTGAGTTCCATCTAAAGCTAAATATTGGCGAGA  
GACCGATAGCGAACAAGTACCGTGAGGGAAAGATGAAAAGCACTTTGGAAAGA  
GAGTTAAACAGTACGTGAAATTGTTGAAAGGGAAACGATTGAAGTCAGTCGTGA  
CTGAGAGGCTCAGCCGGTTCTGCCGGTGTATTCCCCTCAGTCGGGTCAACATCAG  
TTTTGTTCCGGTGGATAAGGGCAGCTGGAAGGTGGCACCTCCGGGTGTGTTATAGC  
CAGCTGTCGCATACATCGAATGAGACTGAGGAATGCAGCTCGCCTTTATGGCCGG  
GGTTCGCCCACGTCCGAGCTTAGGATGTTGACATAATGGCTTTAAACGACC

**33. *Naganishia diffluens* SWU-NGP 1-5-1**

>SWU-NGP 1-5-1 (576 bp)

AACAAGGATTCCCCTAGTAACGGCGAGTGAAGCGGGAAGAGCTCAAATTTGAAA  
TCTAGTAGCCTTCGGCTGCTCGAGTTGTAATCTAGAGAAGTGTTTTCCGTGCCGGC  
CCATGTACAAGTCCCTTGGAACAGGGCGTCATAGAGGGTGAGAATCCCGTCCTTG  
ACATGGACCCCCGGTGCTCTGTGATACACTTTCAACGAGTCGAGTTGTTTGGGAA  
TGCAGCTCAAAATGGGTGGTGAATTCCATCTAAAGCTAAATATTGGCGAGAGACC  
GATAGCGAACAAGTACCGTGAGGGAAAGATGAAAAGCACTTTGGAAAGAGAGT  
TAAACAGTACGTGAAATTGTTGAAAGGGAAACGATTGAAGTCAGTCATGCTCTTT  
GGTATTTATATCATTGAGTGGGGTCAACATCAGTTTTGAGCGATGGATAAAGGCA  
CTAGGAAGGTAGCACTCTCGGGTGAACCTTATAGCCCAGCGTCATATACATTGTTT  
GGGACTGAGGAACGCAGCATGCCTTTATGGCCGGGATTCGTCCACGTACATGCTT  
AGGATGTTGACATAATGGCTTTAAACGA

**34. *Cystobasidium slooffiae* SWU-NAP 4-2-2**

>SWU-NAP 4-2-2 (583 bp)

CCCTAGTAACGGCGAGTGAAGTGGGAAAAGCTCAACTTTGAAATCTGGCACCTTC  
GGTGTCCGAGTTGTAGTCTCAAGAAGTGTTTTCTGTGCTGGTCCATGTATGAGTCT  
GTTGGAACACAGCGTCATAGAGGGTGACAACCCCGTTCATGACATGGATAACCAG  
TGCTTTGTGATACACTCTCGAAGAGTCGAGTTGTTTGGGAATGCAGCTCAAATTGG  
GTGGTAAATTCCATCTAAAGCTAAATATTGGCGAGAGACCGATAGCAAACAAGT  
ACCGTGAGGGAAAGATGAAAAGCACTTTGGAAAGAGAGTTAACAGTACGTGAA  
ATTGTTGAAAGGGAAACGATTGAAGTCAGACGTGCGTGATGCGGTTTCAGCACTG  
GTTCCGCCAGTGTGTATTCCGTATCTTTGCAGGCCAACATCGGTTTTCGATAGTCGGA  
TAAAGATTAGTTGAATGTGGCACCTACGGGTGTGTTATAGCTTCTAATTGAATACG  
ATTGTTGAGACCGAGGAACGCAGCGCGCCGCAAGGCAAAGGTTCCGACCTTTTC  
GCGCTTAGGATGTTGGTGAATGGCTTTAAACGAC

**35. *Cyberlindnera saturnus* SWU-NGP 1-5-2-1**

>SWU-NGP 1-5-2-1 (572 bp)

ACCAACAGGGATTGCCTCAGTAACGGCGAGTGAAGCGGCAAAAGCTCAAATTTG  
AAATCTGGTACCTTTGGTGCCCGAGTTGTAATTTGAAGATAGTTTTCTGGTGCTGG  
CCCTTGCTCTATGTTCCCTTGGAACAGGACGTCACAGAGGGTGAGAATCCCGTCTGG  
CGGGGTGTCCAGTGCTTTGTAGATTTCTATCGACGAGTCGAGTTGTTTGGGAATGC  
AGCTCTAAGTGGGTGGTAAATTCCATCTAAAGCTAAATATTGGCGAGAGACCGAT  
AGCGAACAAGTACAGTGATGGAAAGATGAAAAGAAGTTTGGAAAGAGAGTGAA  
AAAGTACGTGAAATTGTTGAAAGGGAAGGGTATTAGATCAGACTTGGTGTTTTGT  
GATTATCTTCCCTTCTTGGGTTGTGCACTCGCATTTCACTGGGCCAGCATCGGTTCC  
GGTGGTAAGATAATGACATTGGAACGTGGCACTACCTTCGGGTGGTGTGTTATAG  
CCCTTGTTGATGTTGCCTACCTGGACCGAGGACTGCGGCTTTTGCCTAGGATGCTG  
GCGTAATGATCTAACACCGC

**36. *Papiliotrema flavescens* SWU-NGTP 2-5**

>SWU-NGTP 2-5 (592 bp)

CTAACAAGGATTCCCCTAGTAACGGCGAGTGAACCGGGAAGAGCTCAAATTTGA  
AATCTGGCGTGCTCAGTGCGTCCGAGTTGTAATCTATAGAGTCGTTTTCCGTGCCG  
GACTGTGTCCAAGTCCCTTGGAACAGGGTATCAAAGAGGGTGATAATCCCGTACT  
TGACACAATGACCGGTGCTCTGTGATACGTCTTCTACGAGTCGAGTTGTTTGGGA

ATGCAGCTCAAAATGGGTGGTGAGTTCCATCTAAAGCTAAATATTGGCGAGAGA  
CCGATAGCGAACAAGTACCGTGAGGGAAAGATGAAAAGCACTTTGGAAAGAGA  
GTTAAACAGTACGTGAAATTGTTAAAAGGGAAACGATTGAAGTCAGTCGTGACT  
GAGAGGCTCAGCCGGTTCTGCCGGTGTATTCCCCTCAGTCGGGTCAACATCAGTTT  
TGTTCCGTGGATAAGGGCAGTTGGAAGGTGGCACCCCTCGGGTGTGTTATAGCCAG  
CTGTCGCATACATCGGATGAGACTGAGGAATGCAGCTCGCCTTTATGGCCGGGGT  
TCGCCACGTTTCGAGCTTAGGATGTTGACATAATGGCTTTAAACG

**37. *Cyberlindnera saturnus* SWU-NGTP 4-14-2**

>SWU-NGTP 4-14-2 (470 bp)

AGTAACGGCGAGTGAAGCGGCAAAAGCTCAAATTTGAAATCTGGTACCTTTGGT  
GCCCCAGTTGTAATTTGAAGATAGTTTTCTGGTGCTGGCCCTTGTCTATGTTTCCTTG  
GAACAGGACGTCACAGAGGGTGAGAATCCCGTCTGGCGGGGTGTCCAGTGCTTT  
GTAGATTTCTATCGACGAGTCGAGTTGTTTGGGAATGCAGCTCTAAGTGGGTGGT  
AAATTCCATCTAAAGCTAAATATTGGCGAGAGACCGATAGCGAACAAGTACAGT  
GATGGAAAGATGAAAAGAACTTTGAAAAGAGAGTGAAAAAGTACGTGAAATTG  
TTGAAAGGGAAGGGTATTAGATCAGACTTGGTGTTTTGTGATTATCTTCCCTTCTT  
GGGTTGTGCACTCGCATTTCACTGGGCCAGCATCGGTTTCGGGTGGTAAGATAATG  
ACATTGGAACGTGGCACTACCTTCGGGTGGTG

**38. *Saitozyma podzolica* SWU-NGP 5-3-2**

>SWU-NGP 5-3-2 (588 bp)

CAAGGATTCCTTAGTAGCGGCGAGCGAAGCGGGAAGAGCTCAAATTTGAAAGC  
TGCGTCCTACGGGCGTCCGCATTGTAATCTATAGAGGCGTTTTCTGTGCTGGACC  
GTGTCCAAGTCCCTTGGAACAGGGTATCAAAGAGGGTGACAATCCCGTACTTGAC  
ACGACAACCAGTGCTCTGTGATACGTCTTCTACGAGTCGAGTTGTTTGGGAATGC  
AGCTCAAAATGGGTGGTGAATTCATCTAAAGCTAAATATTGGCGAGAGACCGA  
TAGCGAACAAGTACCGTGAGGGAAAGATGAAAAGCACTTTGGAAAGAGAGTTA  
AACAGTATGTGAAATTGTTGAAAGGGAAACGATGGAGGTCAGTCGTGTCTGTGG  
GATTCAGCCGTCTCTGGCGGTGTACTTCCCACAGACGGGTCAACATCAGTTTTGG  
CTGGCGGATAAAGGCAGGAGGAAGGTGGCACCCCCGGGTGTGTTATAGCCTCTT  
GTTGCATACGCTGGCTGAGACTGAGGAATGCAGCTCGCCTTTATGGCCGGGGTTC  
GCCACGTTTCGAGCTTAGGATGTTGACATAATGGCCTTCAACG



**39. *Papiliotrema flavescens* SWU-NAP 3-2**

>SWU-NAP 3-2 (585 bp)

ATTCCCCTAGTAACGGCGAGTGAACCGGGAAGAGCTCAAATTTGAAATCTGGCG  
TGCTCAGTGCGTCCGAGTTGTAATCTATAGAGTCGTTTTCCGTGCCGGACTGTGTC  
CAAGTCCCTTGGAACAGGGTATCAAAGAGGGTGATAATCCCGTACTTGACACAA  
TGACCGGTGCTCTGTGATACGTCTTCTACGAGTCGAGTTGTTTGGGAATGCAGCTC  
AAAATGGGTGGTGAGTTCCATCTAAAGCTAAATATTGGCGAGAGACCGATAGCG  
AACAAAGTACCGTGAGGGAAAGATGAAAAGCACTTTGGAAAGAGAGTTAAACAG  
TACGTGAAATTGTTAAAAGGGAAACGATTGAAGTCAGTCGTGACTGAGAGGCTC  
AGCCGGTTCTGCCGGTGTATTCCCCTCAGTCGGGTCAACATCAGTTTTTGTTCCGGTG  
GATAAGGGCAGTTGGAAGGTGGCACCCCTCGGGTGTGTTATAGCCAGCTGTCGCAT  
ACATCGGATGAGACTGAGGAATGCAGCTCGCCTTTATGGCCGGGGTTCGCCCACG  
TTCGAGCTTAGGATGTTGACATAATGGCTTTAAACGAC

**40. *Lipomyces mesembrius* SWU-NAP 8-4**

>SWU-NAP 8-4 (571 bp)

AAACCAACAGGGATTGCCTTAGTAACTGCGAGTGAAGCGGCAAGAGCTCAAATT  
TGAAATCTGGCACCTTCGGTGTCCGAGTTGTAATTTGTAGAAGCATCTTTTGGATT  
GGTCCTTGCATATGTTTCCTTGAACAGGACATCATAGAGGGTGAGAATCCCGTTC  
ATGGTGGGGAATCCAATTCTTTGTAAAGTGCTTTCGAAGAGTCGAGTTGTTTGGGA  
ATGCAGCTCTAAGTGGGTGGTAAATTCCATCTAAAGCTAAATATTGGCGAGAGAC  
CGATAGCGAACAAAGTACAGTGATGGAAAGATGAAAAGAACTCCGAAAGGAGAG  
TGAAAAAGGACGTGAAATTGTTGAAAGGGAAGTGCTTGAGATCAGTCTTAAGGT  
TTAGTGATCAGTCTTCCTTTTGGTTGGTGCCTCACTATTTCTTAGGCCAACATCAG  
TTTTGGCGGCAGGATAATGACATTGGAATGTGGCTCTTTCGGGAGTGTTATAGCCT  
TTGTTGATACTGCCTGCTTAGACTGAGGACTGCGCTTTTGCTAGGATGTTGGCATA  
ATGATCTTAAGCAGCCCGT

**41. *Saitozyma podzolica* SWU-NAP 5-4-2**

>SWU-NAP 5-4-2 (590 bp)

CAAGGATTCCCTTAGTAGCGGCGAGCGAAGCGGGAAGAGCTCAAATTTGAAAGC  
TGGCGTCCTACGGGCGTCCGCATTGTAATCTATAGAGGCGTTTTCTGTGCTGGACC  
GTGTCCAAGTCCCTTGGAACAGGGTATCAAAGAGGGTGACAATCCCGTACTTGAC  
ACGACAACCAGTGCTCTGTGATACGTCTTCTACGAGTCGAGTTGTTTGGGAATGC

AGCTCAAAATGGGTGGTGAATTCCATCTAAAGCTAAATATTGGCGAGAGACCGA  
TAGCGAACAAGTACCGTGAGGGAAAGATGAAAAGCACTTTGGAAAGAGAGTTA  
AACAGTATGTGAAATTGTTGAAAGGGAAACGATGGAGGTCAGTCGTGTCTGTGG  
GATTCAGCCGTCTCTGGCGGTGTACTTCCCACAGACGGGTCAACATCAGTTTTGG  
CTGGCGGATAAAGGCAGGAGGAAGGTGGCACCCCCGGGTGTGTTATAGCCTCTT  
GTTGCATACGCTGGCTGAGACTGAGGAATGCAGCTCGCCTTTATGGCCGGGGTTC  
GCCACGTTTCGAGCTTAGGATGTTGACATAATGGCCTTCAACGAC

**42. *Papiliotrema flavescens* SWU-NATP 4-15**

> SWU-NATP 4-15 (576 bp)

CAAGGATTCCCCTAGTAACGGCGAGTGAACCGGGAAGAGCTCAAATTTGAAATC  
TGGCGTGCTCAGTGCCTCCGAGTTGTAATCTATAGAGTCGTTTTCCGTGCCGGACT  
GTGTCCAAGTCCCTTGGAACAGGGTATCAAAGAGGGTGATAATCCCGTACTTGAC  
ACAATGACCGGTGCTCTGTGATACGTCTTCTACGAGTCGAGTTGTTTGGGAATGC  
AGCTCAAAATGGGTGGTGAAGTCCATCTAAAGCTAAATATTGGCGAGAGACCGA  
TAGCGAACAAGTACCGTGAGGGAAAGATGAAAAGCACTTTGGAAAGAGAGTTA  
AACAGTACGTGAAATTGTTAAAAGGGAAACGATTGAAGTCAGTCGTGACTGAGA  
GGCTCAGCCGGTTCTGCCGGTGTATTCCCCTCAGTCGGGTCAACATCAGTTTTGTT  
CGGTGGATAAAGGCAGTTGGAAGGTGGCACCTCGGGTGTGTTATAGCCAGCTGT  
CGCATACATCGGATGAGACTGAGGAATGCAGCTCGCCTTTATGGCCGGGGTTCGC  
CCACGTTTCGAGCTTAGGATGTTGACATAA

**43. *Lipomyces tetrasporus* SWU-NAP 4-2-1**

>SWU-NAP 4-2-1 (562 bp)

ACCAACAGGGATTGCCTTAGTAACTGCGAGTGAAGCGGCAAGAGCTCAAATTTG  
AAATCTGGCACCTTCGGTGTCCGAGTTGTAATTTGTAGAAGCATCTTTTGGATTGG  
TCCTTGCATATGTTCCCTTGGAACAGGACATCATAGAGGGTGAGAATCCCGTTCAT  
GGTGGGGAATCCAATTCTTTGTAAAGTGCTTTCGAAGAGTCGAGTTGTTTGGGAAT  
GCAGCTCTAAGTGGGTGGTAAATTCCATCTAAAGCTAAATATTGGCGAGAGACCG  
ATAGCGAACAAGTACAGTGATGGAAAGATGAAAAGAACTCCGAAAGGAGAGTG  
AAAAAGGACGTGAAATTGTTGAAAGGGAAAGTGCTTGAGATCAGTCTTAAGGTTT  
AGTGATCAGTCTTCCTTTTGGTTGGTGCCTCACTATTTCTTAGGCCAACATCAGTT  
TTCGCGGCAGGATAATGACATTGGAATGTGGCTCTTTCGGGAGTGTTATAGCCTTT

GTTGATACTGCCTGCTTAGACTGAGGACCGCGCTTTTGCTAGGATGTTGGCATAAT  
GATCTTAAGC

**44. *Lipomyces tetrasporus* SWU-NAP 5-3-1-1**

>SWU-NAP 5-3-1-1 (538 bp)

TGCGAGTGAAGCGGCAAGAGCTCAAATTTGAAATCTGGCACCTTCGGTGTCCGAG  
TTGTAATTTGTAGAAGCATCTTTTGGATTGGTCCTTGCATATGTTCCCTTGGAAACAG  
GACATCATAGAGGGTGAGAATCCCGTTCATGGTGGGGAATCCAATTCTTTGTAAA  
GTGCTTTCGAAGAGTCGAGTTGTTTGGGAATGCAGCTCTAAGTGGGTGGTAAATT  
CCATCTAAAGCTAAATATTGGCGAGAGACCGATAGCGAACAAGTACAGTGATGG  
AAAGATGAAAAGAACTCCGAAAGGAGAGTGAAAAAGGACGTGAAATTGTTGAA  
AGGGAAGTGCTTGAGATCAGTCTTAAGGTTTAGTGATCAGTCTTCCTTTTGGTTGG  
TGCACTCACTATTTCTTAGGCCAACATCAGTTTTCGCGGCAGGATAATGACATTGG  
AATGTGGCTCTTTCGGGAGTGTTATAGCCTTTGTTGATACTGCCTGCTTAGACTGA  
GGACCGCGCTTTTGCTAGGATGTTGGCATAATGATCTTAAGC

**45. *Lipomyces mesembrius* SWU-NAP 4-13**

>SWU-NAP 4-13 (567 bp)

AAACCAACAGGGATTGCCTTAGTAAGTGCAGTGAAGCGGCAAGAGCTCAAATT  
TGAAATCTGGCACCTTCGGTGTCCGAGTTGTAATTTGTAGAAGCATCTTTTGGATT  
GGTCCTTGCATATGTTCCCTTGGAAACAGGACATCATAGAGGGTGAGAATCCCGTTC  
ATGGTGGGGAATCCAATTCTTTGTAAAGTGCTTTCGAAGAGTCGAGTTGTTTGGGA  
ATGCAGCTCTAAGTGGGTGGTAAATTCCATCTAAAGCTAAATATTGGCGAGAGAC  
CGATAGCGAACAAGTACAGTGATGGAAAGATGAAAAGAACTCCGAAAGGAGAG  
TGAAAAAGGACGTGAAATTGTTGAAAGGGAAGTGCTTGAGATCAGTCTTAAGGT  
TTAGTGATCAGTCTTCCTTTTGGTTGGTGCCTCACTATTTCTTAGGCCAACATCAG  
TTTTGGCGGCAGGATAATGACATTGGAATGTGGCTCTTTCGGGAGTGTTATAGCCT  
TTGTTGATACTGCCTGCTTAGACTGAGGACTGCGCTTTTGCTAGGATGTTGGCATA  
ATGATCTTAAGCAGC

**46. *Lipomyces mesembrius* SWU-NATP 1-4**

>SWU-NATP 1-4 (567 bp)

AAACCAACAGGGATTGCCTTAGTAAGTGCAGTGAAGCGGCAAGAGCTCAAATT  
TGAAATCTGGCACCTTCGGTGTCCGAGTTGTAATTTGTAGAAGCATCTTTTGGATT

GGTCCTTGCATATGTTTCCTTGGAACAGGACATCATAGAGGGTGAGAATCCCGTTC  
ATGGTGGGGAATCCAATTCTTTGTAAAGTGCTTTCGAAGAGTCGAGTTGTTTGGGA  
ATGCAGCTCTAAGTGGGTGGTAAATTCCATCTAAAGCTAAATATTGGCGAGAGAC  
CGATAGCGAACAAGTACAGTGATGGAAAGATGAAAAGAACTCCGAAAGGAGAG  
TGAAAAAGGACGTGAAATTGTTGAAAGGGAAGTGCTTGAGATCAGTCTTAAGGT  
TTAGTGATCAGTCTTCCTTTTGGTTGGTGCACTCACTATTTCTTAGGCCAACATCAG  
TTTTGGCGGCAGGATAATGACATTGGAATGTGGCTCTTTCGGGAGTGTTATAGCCT  
TTGTTGATACTGCCTGCTTAGACTGAGGACTGCGCTTTTGCTAGGATGTTGGCATA  
ATGATCTTAAGCAGC

**47. *Lipomyces mesembrius* SWU-NATP 4-11**

>SWU-NATP 4-11 (567 bp)

AAACCAACAGGGATTGCCTTAGTAAGTGCAGTGGAAGCGGCAAGAGCTCAAATT  
TGAAATCTGGCACCTTCGGTGTCCGAGTTGTAATTTGTAGAAGCATCTTTTGGATT  
GGTCCTTGCATATGTTTCCTTGGAACAGGACATCATAGAGGGTGAGAATCCCGTTC  
ATGGTGGGGAATCCAATTCTTTGTAAAGTGCTTTCGAAGAGTCGAGTTGTTTGGGA  
ATGCAGCTCTAAGTGGGTGGTAAATTCCATCTAAAGCTAAATATTGGCGAGAGAC  
CGATAGCGAACAAGTACAGTGATGGAAAGATGAAAAGAACTCCGAAAGGAGAG  
TGAAAAAGGACGTGAAATTGTTGAAAGGGAAGTGCTTGAGATCAGTCTTAAGGT  
TTAGTGATCAGTCTTCCTTTTGGTTGGTGCACTCACTATTTCTTAGGCCAACATCAG  
TTTTGGCGGCAGGATAATGACATTGGAATGTGGCTCTTTCGGGAGTGTTATAACCT  
TTGTTGATACTGCCTGCTTATACTGACGACTGCGCTTTTGCTAGGATGTTGGCATA  
ATGATCTTAAGCAGC

**48. *Hannaella* sp. SWU-YGP 11-1**

>SWU-YGP 11-1 (597 bp)

AAACTAACAAGGATTCCCCTAGTAGCGGCGAGCGAACC GGGAAGAGCTCAAATT  
TAAAATCTGGCGTCTTTCAGGCGTCCGAGTTGTAATCTACAGAAGTGTTTTCCGTG  
CCGGACCGTGTCCAAGTCCCTTGGAATAGGGTATCAAAGAGGGTGATAATCCCGT  
ACTTGACACGACAACCGGTGCTCTGTGATACATTTTCTACGAGTCGAGTTGTTTGG  
GAATGCAGCTCAAAATGGGTGGTAAATTCCATCTAAAGCTAAATATAGGCGAGA  
GACCGATAGCGAACAAGTACCGTGAGGGAAAGATGAAAAGCACTTTGGAAAGA  
GAGTTAAACAGTACGTGAAATTGTTAAAAGGGAACGATTGAAGTCAGTCATGT  
CTATTGGTTTCAGCTAGCTCTGCTAGTGTATTACCTTTAGACGGGTCAACATCAGT

TTTAGACGGTGGAAAAAGGCATGAGGAAAGTAGCAACTCCGGTTGTGTTATAGC  
CTCGTGTTCATACACTGTCCGAGACTGAGGAATGCAGCTCGCCTTTATGGCCGG  
GGTTCGCCCACGTTTCGAGCTTAGGATGTTGACATAATGGCTTTAAACGAC

**49. *Lipomyces mesembrius* SWU-NATP 4-8**

>SWU-NATP 4-8 (567 bp)

AAACCAACAGGGATTGCCTTAGTAAGTGCAGTGAAGCGGCAAGAGCTCAAATT  
TGAAATCTGGCACCTTCGGTGTCCGAGTTGTAATTTGTAGAAGCATCTTTTGGATT  
GGTCCTTGCATATGTTCCCTTGGAACAGGACATCATAGAGGGTGAGAATCCCGTTC  
ATGGTGGGGAATCCAATTCTTTGTAAAGTGCTTTCGAAGAGTCGAGTTGTTTGGGA  
ATGCAGCTCTAAGTGGGTGGTAAATTCCATCTAAAGCTAAATATTGGCGAGAGAC  
CGATAGCGAACAAGTACAGTGATGGAAAGATGAAAAGAACTCCGAAAGGAGAG  
TGAAAAGGACGTGAAATTGTTGAAAGGGAAGTGCTTGAGATCAGTCTTAAGGT  
TTAGTGATCAGTCTTCCTTTTGGTTGGTGCCTCACTATTTCTTAGGCCAACATCAG  
TTTTGGCGGCAGGATAATGGCATTGGAATGTGGCTCTTTCGGGAGTGTTATAGCCT  
TTGTTGATACTGCCTGCTTAGACTGAGGACTGCGCTTTTGCTAGGATGTTGGCATA  
ATGATCTTAAGCAGC

**50. *Lipomyces tetrasporus* SWU-NAP 5-3-1-2**

>SWU-NAP 5-3-1-2 (567 bp)

AAACCAACAGGGATTGCCTTAGTAAGTGCAGTGAAGCGGCAAGAGCTCAAATT  
TGAAATCTGGCACCTTCGGTGTCCGAGTTGTAATTTGTAGAAGCATCTTTTGGATT  
GGTCCTTGCATATGTTCCCTTGGAACAGGACATCATAGAGGGTGAGAATCCCGTTC  
ATGGTGGGGAATCCAATTCTTTGTAAAGTGCTTTCGAAGAGTCGAGTTGTTTGGGA  
ATGCAGCTCTAAGTGGGTGGTAAATTCCATCTAAAGCTAAATATTGGCGAGAGAC  
CGATAGCGAACAAGTACAGTGATGGAAAGATGAAAAGAACTCCGAAAGGAGAG  
TGAAAAGGACGTGAAATTGTTGAAAGGGAAGTGCTTGAGATCAGTCTTAAGGT  
TTAGTGATCAGTCTTCCTTTTGGTTGGTGCCTCACTATTTCTTAGGCCAACATCAG  
TTTTCGCGGCAGGATAATGACATTGGAATGTGGCTCTTTCGGGAGTGTTATAGCCT  
TTGTTGATACTGCCTGCTTAGACTGAGGACCGCGCTTTTGCTAGGATGTTGGCATA  
ATGATCTTAAGCAGC

**51. *Papiliotrema flavescens* SWU-YGPui 12-1**

>SWU-YGPui 12-1 (572 bp)

GGCGAGTGAACCGGGAAGAGCTCAAATTTGAAATCTGGCGTGCTCAGTGCGTCC  
GAGTTGTAATCTATAGAGTCGTTTTCCGTGCCGGACTGTGTCCAAGTCCCTTGGAA  
CAGGGTATCAAAGAGGGTGATAATCCCGTACTTGACACAATGACCGGTGCTCTGT  
GATACGTCTTCTACGAGTCGAGTTGTTTGGGAATGCAGCTCAAAATGGGTGGTGA  
GTTCCATCTAAAGCTAAATATTGGCGAGAGACCGATAGCGAACAAGTACCGTGA  
GGGAAAGATGAAAAGCACTTTGGAAAGAGAGTTAAACAGTACGTGAAATTGTTA  
AAAGGGAAACGATTGAAGTCAGTCGTGACTGAGAGGCTCAGCCGGTTCTGCCGG  
TGTATTCCCCTCAGTCGGGTCAACATCAGTTTTTGTTCGGTGGATAAGGGCAGTTGG  
AAGGTGGCACCTCGGGTGTGTTATAGCCAGCTGTCGCATACATCGGATGAGACT  
GAGGAATGCAGCTCGCCTTTATGGCCGGGGTTCGCCCACGTTTCGAGCTTAGGATG  
TTGACATAATGGCTTTAAACGACC

**52. *Lipomyces tetrasporu* SWU-NATP 2-12**

>SWU-NATP 2-12 (557 bp)

CAGGGATTGCCTTAGTAACTGCGAGTGAAGCGGCAAGAGCTCAAATTTGAAATCT  
GGCACCTTCGGTGTCCGAGTTGTAATTTGTAGAAGCATCTTTTGGATTGGTCCTTG  
CATATGTTTCCTTGGAACAGGACATCATAGAGGGTGAGAATCCCGTTTCATGGTGGG  
GAATCCAATTCTTTGTAAAGTGCTTTTGAAGAGTCGAGTTGTTTGGGAATGCAGCT  
CTAAGTGGGTGGTAAATTCCATCTAAAGCTAAATATTGGCGAGAGACCGATAGC  
GAACAAGTACAGTGATGGAAAGATGAAAAGAACTCCGAAAGGAGAGTGAAAAA  
GGACGTGAAATTGTTGAAAGGGAAGTGCTTGAGATCAGTCTTAAGGTTTAGTGAT  
CAGTCTTCCTTTTGGTTGGTGCACCTACTATTTCTTAGGCCAACATCAGTTTTCGCG  
GCAGGATAATGACATTGGAATGTGGCTCTTTCGGGAGTGTTATAGCCTTTGTTGAT  
ACTGCCTGCTTAGACTGAGGACCGCGCTTTTGCTAGGATGTTGGCATAATGATCTT  
AAGC

**53. *Lipomyces starkeyi* SWU-NAP 2-2**

>SWU-NAP 2-2 (563 bp)

ACCAACAGGGATTGCCTTAGTAACTGCGAGTGAAGCGGCAAGAGCTCAAATTTG  
AAATCTGGCACCTTCGGTGTCCGAGTTGTAATTTGTAGAAGCATCTTTTGGATTGG  
TCCTTGCAATATGTTTCCTTGGAACAGGACATCATAGAGGGTGAGAATCCCGTTTCAT  
GGTGGGGAATCCAATTCTTTGTAAAGTGCTTTTGAAGAGTCGAGTTGTTTGGGAAT

GCAGCTCTAAGTGGGTGGTAAATTCCATCTAAAGCTAAATATTGGCGAGAGACCG  
ATAGCGAACAAGTACAGTGATGGAAAGATGAAAAGAACTCCGAAAGGAGAGTG  
AAAAAGGACGTGAAATTGTTGAAAGGGAAGTGCTTGAGATCAGTCTTAAGGTTT  
AGTGATCAGTCTTCCTTTTGGTTGGTGCCTCACTATTTCTTAGGCCAACATCAGTT  
TTGGCGGCAGGATAATGACATTGGAATGTGGCTCTTTCGGGAGTGTTATAGCCTTT  
GTTGATACTGCCTGCTTAGACTGAGGACTGCGCTTTTGCTAGGATGTTGGCATAAT  
GATCTTAAGCA

**54. *Papiliotrema flavescens* SWU-NAP 1-4**

>SWU-NAP 1-4 (594 bp)

AACAAGGATTCCCCTAGTAACGGCGAGTGAACCGGGAAGAGCTCAAATTTGAAA  
TCTGGCGTGCTCAGTGCGTCCGAGTTGTAATCTATAGAGTCGTTTTCCGTGCCGGA  
CTGTGTCCAAGTCCCTTGAACAGGGTATCAAAGAGGGTGATAATCCCGTACTTG  
ACACAATGACCGGTGCTCTGTGATACGTCTTCTACGAGTCGAGTTGTTTGGGAAT  
GCAGCTCAAAATGGGTGGTGAGTTCCATCTAAAGCTAAATATTGGCGAGAGACC  
GATAGCGAACAAGTACCGTGAGGGAAAGATGAAAAGCACTTTGGAAAGAGAGT  
TAAACAGTACGTGAAATTGTTAAAAGGGAACGATTGAAGTCAGTCGTGACTGA  
GAGGCTCAGCCGGTTCTGCCGGTGTATTCCCCTCAGTCGGGTCAACATCAGTTTTG  
TTCGGTGGATAAGGGCAGTTGGAAGGTGGCACCCTCGGGTGTGTTATAGCCAGCT  
GTCGCATACATCGGATGAGACTGAGGAATGCAGCTCGCCTTTATGGCCGGGGTTC  
GCCCACGTTTCGAGCTTAGGATGTTGACATAATGGCTTTAAACGACCC

**55. *Lipomyces tetrasporus* SWU-NGP 6-5**

>SWU-NGP 6-5 (565 bp)

AAACCAACAGGGATTGCCTTAGTAAGTGCAGTGAAGCGGCAAGAGCTCAAATT  
TGAAATCTGGCACCTTCGGTGTCCGAGTTGTAATTTGTAGAAGCATCTTTTGGATT  
GGTCCTTGCATATGTTCCCTTGAACAGGACATCATAGAGGGTGAGAATCCCGTTC  
ATGGTGGGGAATCCAATTCCTTTGTAAAGTGCTTTCGAAGAGTCGAGTTGTTTGGGA  
ATGCAGCTCTAAGTGGGTGGTAAATTCCATCTAAAGCTAAATATTGGCGAGAGAC  
CGATAGCGAACAAGTACAGTGATGGAAAGATGAAAAGAACTCCGAAAGGAGAG  
TGAAAAAGGACGTGAAATTGTTGAAAGGGAAGTGCTTGAGATCAGTCTTAAGGT  
TTAGTGATCAGTCTTCCTTTTGGTTGGTGCCTCACTATTTCTTAGGCCAACATCAG  
TTTTCGCGGCAGGATAATGACATTGGAATGTGGCTCTTTCGGGAGTGTTATAGCCT

TTGTTGATACTGCCTGCTTAGACTGAGGACCGCGCTTTTGCTAGGATGTTGGCATA  
ATGATCTTAAGCA

**56. *Lipomyces tetrasporus* SWU-NAP 2-3**

>SWU-NAP 2-3 (548 bp)

AAACCAACAGGGATTGCCTTAGTAACTGCGAGTGAAGCGGCAAGAGCTCAAATT  
TGAAATCTGGCACCTTCGGTGTCCGAGTTGTAATTTGTAGAAGCATCTTTTGGATT  
GGTCCTTGCATATGTTCCCTTGAACAGGACATCATAGAGGGTGAGAATCCCGTTC  
ATGGTGGGGAATCCAATTCTTTGTAAAGTGCTTTCGAAGAGTCGAGTTGTTTGGGA  
ATGCAGCTCTAAGTGGGTGGTAAATTCCATCTAAAGCTAAATATTGGCGAGAGAC  
CGATAGCGAACAAGTACAGTGATGGAAAGATGAAAAGAACTCCGAAAGGAGAG  
TGAAAAAGGACGTGAAATTGTTGAAAGGGAAGTGCTTGAGATCAGTCTTAAGGT  
TTAGTGATCAGTCTTCCTTTTGGTTGGTGCCTCACTATTTCTTAGGCCAACATCAG  
TTTTCGCGGCAGGATAATGACATTGGAATGTGGCTCTTTCGGGAGTGTTATAGCCT  
TTGTTGATACTGCCTGCTTAGACTGAGGACCGCGCTTTTGCTAGGATGTTGG

**57. *Lipomyces tetrasporus* SWU-NAP 5-5**

>SWU-NAP 5-5 (564 bp)

CCAACAGGGATTGCCTTAGTAACTGCGAGTGAAGCGGCAAGAGCTCAAATTTGA  
AATCTGGCACCTTCGGTGTCCGAGTTGTAATTTGTAGAAGCATCTTTTGGATTGGT  
CCTTGCATATGTTCCCTTGAACAGGACATCATAGAGGGTGAGAATCCCGTTCATG  
GTGGGGAATCCAATTCTTTGTAAAGTGCTTTCGAAGAGTCGAGTTGTTTGGGAATG  
CAGCTCTAAGTGGGTGGTAAATTCCATCTAAAGCTAAATATTGGCGAGAGACCGA  
TAGCGAACAAGTACAGTGATGGAAAGATGAAAAGAACTCCGAAAGGAGAGTGAA  
AAAAGGACGTGAAATTGTTGAAAGGGAAGTGCTTGAGATCAGTCTTAAGGTTTA  
GTGATCAGTCTTCCTTTTGGTTGGTGCCTCACTATTTCTTAGGCCAACATCAGTTT  
TCGCGGCAGGATAATGACATTGGAATGTGGCTCTTTCGGGAGTGTTATAGCCTTTG  
TTGATACTGCCTGCTTAGACTGAGGACCGCGCTTTTGCTAGGATGTTGGCATAATG  
ATCTTAAGCAGC

**58. *Lipomyces tetrasporus* SWU-NAP 5-6**

>SWU-NAP 5-6 (562 bp)

AACAGGGATTGCCTTAGTAACTGCGAGTGAAGCGGCAAGAGCTCAAATTTGAAA  
TCTGGCACCTTCGGTGTCCGAGTTGTAATTTGTAGAAGCATCTTTTGGATTGGTCCT



TGCATATGTTCCCTTGGAAACAGGACATCATAGAGGGTGAGAATCCCGTTCATGGTG  
GGGAATCCAATTCTTTGTAAAGTGCTTTCGAAGAGTCGAGTTGTTTGGGAATGCA  
GCTCTAAGTGGGTGGTAAATTCCATCTAAAGCTAAATATTGGCGAGAGACCGATA  
CCGAACAAGTACAGTGATGGAAAGATGAAAAGAAGTCCGAAAGGAGAGTGAAA  
AAGGACGTGAAATTGTTGAAAGGGAAGTGCTTGAGATCAGTCTTAAGGTTTAGTG  
ATCAGTCTTCCTTTTGGTTGGTGCCTCACTATTTCTTAGGCCAACATCAGTTTTCG  
CGGCAGGATAATGACATTGGAATGTGGCTCTTTCGGGAGTGTTATAGCCTTTGTTG  
ATACTGCCTGCTTAGACTGAGGACCGCGCTTTTGCTAGGATGTTGGCATAATGATC  
TTAAGCAGC

**59. *Lipomyces tetrasporus* SWU-NAP 5-2-2**

>SWU-NAP 5-2-2 (556 bp)

GATTGCCTTAGTAACTGCGAGTGAAGCGGCAAGAGCTCAAATTTGAAATCTGGCA  
CCTTCGGTGTCCGAGTTGTAATTTGTAGAAGCATCTTTTGGATTGGTCCTTGCATAT  
GTTCCCTTGGAAACAGGACATCATAGAGGGTGAGAATCCCGTTCATGGTGGGGAATC  
CAATTCTTTGTAAAGTGCTTTCGAAGAGTCGAGTTGTTTGGGAATGCAGCTCTAAG  
TGGGTGGTAAATTCCATCTAAAGCTAAATATTGGCGAGAGACCGATAGCGAACA  
AGTACAGTGATGGAAAGATGAAAAGAAGTCCGAAAGGAGAGTGAAAAAGGACG  
TGAAATTGTTGAAAGGGAAGTGCTTGAGATCAGTCTTAAGGTTTAGTGATCAGTC  
TTCCTTTTGGTTGGTGCCTCACTATTTCTTAGGCCAACATCAGTTTTCGCGGCAGG  
ATAATGACATTGGAATGTGGCTCTTTCGGGAGTGTTATAGCCTTTGTTGATACTGC  
CTGCTTAGACTGAGGACCGCGCTTTTGCTAGGATGTTGGCATAATGATCTTAAGC  
AGC

**60. *Lipomyces starkeyi* SWU-NATP 4-2**

>SWU-NATP 4-2 (556 bp)

GATTGCCTTAGTAACTGCGAGTGAAGCGGCAAGAGCTCAAATTTGAAATCTGGCA  
CCTTCGGTGTCCGAGTTGTAATTTGTAGAAGCATCTTTTGGATTGGTCCTTGCATAT  
GTTCCCTTGGAAACAGGACATCATAGAGGGTGAGAATCCCGTTCATGGTGGGGAATC  
CAATTCTTTGTAAAGTGCTTTCGAAGAGTCGAGTTGTTTGGGAATGCAGCTCTAAG  
TGGGTGGTAAATTCCATCTAAAGCTAAATATTGGCGAGAGACCGATAGCGAACA  
AGTACAGTGATGGAAAGATGAAAAGAAGTCCGAAAGGAGAGTGAAAAAGGACG  
TGAAATTGTTGAAAGGGAAGTGCTTGAGATCAGTCTTAAGGTTTAGTGATCAGTC  
TTCCTTTTGGTTGGTGCCTCACTATTTCTTAGGCCAACATCAGTTTTGGCGGCAG

GATAATGACATTGGAATGTGGCTCTTTCGAGAGTGTTATAGCCTTTGTTGATACTG  
CCTGCTTAGACTGAGGACTGCGCTTTTGCTAGGATGTTGGCATAATGATCTTAAGC  
AGC

**61. *Lipomyces tetrasporus* SWU-NAP 5-2-1**

>SWU-NAP 5-2-1 (551 bp)

TTGCCTTAGTAACTGCGAGTGAAGCGGCAAGAGCTCAAATTTGAAATCTGGCACC  
TTCGGTGTCCGAGTTGTAATTTGTAGAAGCATCTTTTGGATTGGTCCTTGCATATGT  
TCCTTGGAACAGGACATCATAGAGGGTGAGAATCCCGTTCATGGTGGGGAATCC  
AATTCTTTGTAAAGTGCTTTCGAAGAGTCGAGTTGTTTGGGAATGCAGCTCTAAGT  
GGGTGGTAAATTCCATCTAAAGCTAAATATTGGCGAGAGACCGATAGCGAACAA  
GTACAGTGATGGAAAGATGAAAAGAACTCCGAAAGGAGAGTGAAAAAGGACGT  
GAAATTGTTGAAAGGGAAGTGCTTGAGATCAGTCTTAAGGTTTAGTGATCAGTCT  
TCCTTTTGGTTGGTGCACCTCACTATTTCTTAGGCCAACATCAGTTTTCGCGGCAGG  
ATAATGACATTGGAATGTGGCTCTTTCGGGAGTGTTATAGCCTTTGTTGATACTGC  
CTGCTTAGACTGAGGACCGCGCTTTTGCTAGGATGTTGGCATAATGATCTTAAGC

**62. *Lipomyces tetrasporus* SWU-NATP 9-2**

>SWU-NATP 9-2 (552 bp)

TTGCCTTAGTAACTGCGAGTGAAGCGGCAAGAGCTCAAATTTGAAATCTGGCACC  
TTCGGTGTCCGAGTTGTAATTTGTAGAAGCATCTTTTGGATTGGTCCTTGCATATGT  
TCCTTGGAACAGGACATCATAGAGGGTGAGAATCCCGTTCATGGTGGGGAATCC  
AATTCTTTGTAAAGTGCTTTCGAAGAGTCGAGTTGTTTGGGAATGCAGCTCTAAGT  
GGGTGGTAAATTCCATCTAAAGCTAAATATTGGCGAGAGACCGATAGCGAACAA  
GTACAGTGATGGAAAGATGAAAAGAACTCCGAAAGGAGAGTGAAAAAGGACGT  
GAAATTGTTGAAAGGGAAGTGCTTGAGATCAGTCTTAAGGTTTAGTGATCAGTCT  
TCCTTTTGGTTGGTGCACCTCACTATTTCTTAGGCCAACATCAGTTTTCGCGGCAGG  
ATAATGACATTGGAATGTGGCTCTTTCGGGAGTGTTATAGCCTTTGTTGATACTGC  
CTGCTTAGACTGAGGACCGCGCTTTTGCTAGGATGTTGGCATAATGATCTTAAGC

A

**63. *Lipomyces tetrasporus* SWU-NAP 5-3-3**

>SWU-NAP 5-3-3 (549 bp)

CCTTAGTAACTGCGAGTGAAGCGGCAAGAGCTCAAATTTGAAATCTGGCACCTTC  
GGTGTCCGAGTTGTAATTTGTAGAAGCATCTTTTGGATTGGTCCTTGCATATGTTCC  
TTGGAACAGGACATCATAGAGGGTGAGAATCCCGTTCATGGTGGGGAATCCAAT  
TCTTTGTAAAGTGCTTTTCGAAGAGTCGAGTTGTTTGGGAATGCAGCTCTAAGTGGG  
TGGTAAATTCCATCTAAAGCTAAATATTGGCGAGAGACCGATAGCGAACAAGTA  
CAGTGATGGAAAGATGAAAAGAACTCCGAAAGGAGAGTGAAAAAGGACGTGAA  
ATTGTTGAAAGGGAAGTGCTTGAGATCAGTCTTAAGGTTTAGTGATCAGTCTTCCT  
TTTGGTTGGTGCACCTCACTATTTCTTAGGCCAACATCAGTTTTTCGCGGCAGGATAA  
TGACATTGGAATGTGGCTCTTTCGGGAGTGTTATAGCCTTTGTTGATACTGCCTGC  
TTAGACTGAGGACCGCGCTTTTGCTAGGATGTTGGCATAATGATCTTAAGCA

**64. *Lipomyces tetrasporus* SWU-NAP 6-1**

>SWU-NAP 6-1 (545 bp)

GCCTTAGTAACTGCGAGTGAAGCGGCAAGAGCTCAAATTTGAAATCTGGCACCTT  
CGGTGTCCGAGTTGTAATTTGTAGAAGCATCTTTTGGATTGGTCCTTGCATATGTTC  
CTTGGAACAGGACATCATAGAGGGTGAGAATCCCGTTCATGGTGGGGAATCCAA  
TTCTTTGTAAAGTGCTTTTCGAAGAGTCGAGTTGTTTGGGAATGCAGCTCTAAGTGG  
GTGGTAAATTCCATCTAAAGCTAAATATTGGCGAGAGACCGATAGCGAACAAGT  
ACAGTGATGGAAAGATGAAAAGAACTCCGAAAGGAGAGTGAAAAAGGACGTGA  
AATTGTTGAAAGGGAAGTGCTTGAGATCAGTCTTAAGGTTTAGTGATCAGTCTTCC  
TTTTGGTTGGTGCACCTCACTATTTCTTAGGCCAACATCAGTTTTTCGCGGCAGGATA  
ATGACATTGGAATGTGGCTCTTTCGGGAGTGTTATAGCCTTTGTTGATACTGCCTG  
CTTAGACTGAGGACCGCGCTTTTGCTAGGATGTTGGCATAATGATCTT

**65. *Lipomyces tetrasporus* SWU-NAP 13-7**

>SWU-NAP 13-7 (536 bp)

TAGTAACTGCGAGTGAAGCGGCAAGAGCTCAAATTTGAAATCTGGCACCTTCGGT  
GTCCGAGTTGTAATTTGTAGAAGCATCTTTTGGATTGGTCCTTGCATATGTTTCCTTG  
GAACAGGACATCATAGAGGGTGAGAATCCCGTTCATGGTGGGGAATCCAATTCTT  
TGTAAGAGTGCTTTTCGAAGAGTCGAGTTGTTTGGGAATGCAGCTCTAAGTGGGTGG  
TAAATTCCATCTAAAGCTAAATATTGGCGAGAGACCGATAGCGAACAAGTACAG  
TGATGGAAAGATGAAAAGAACTCCGAAAGGAGAGTGAAAAAGGACGTGAAATT

GTTGAAAGGGAAGTGCTTGAGATCAGTCTTAAGGTTTAGTGATCAGTCTTCCTTTT  
GGTTGGTGCCTCACTATTTCTTAGGCCAACATCAGTTTTCGCGGCAGGATAATGA  
CATTGGAATGTGGCTCTTTCGGGAGTGTTATAGCCTTTGTTGATACTGCCTGCTTA  
GACTGAGGACCGCGCTTTTGCTAGGATGTTGGCATAATG

**66. *Lipomyces starkeyi* SWU-NATP 1-1**

>SWU-NATP 1-1 (546 bp)

GATTGCCTTAGTAACTGCGAGTGAAGCGGCAAGAGCTCAAATTTGAAATCTGGCA  
CCTTCGGTGTCCGAGTTGTAATTTGTAGAAGCATCTTTTGGATTGGTCCTTGCATAT  
GTTCTTTGGAACAGGACATCATAGAGGGTGAGAATCCCGTTCATGGTGGGGAATC  
CAATTCCTTTGTAAAGTGCTTTCGAAGAGTCGAGTTGTTTGGGAATGCAGCTCTAAG  
TGGGTGGTAAATTCCATCTAAAGCTAAATATTGGCGAGAGACCGATAGCGAACA  
AGTACAGTGATGGAAAGATGAAAAGAACTCCGAAAGGAGAGTGAAAAAGGACG  
TGAAATTGTTGAAAGGGAAGTGCTTGAGATCAGTCTTAAGGTTTAGTGATCAGTC  
TTCCTTTTGGTTGGTGCCTCACTATTTCTTAGGCCAACATCAGTTTTGGCGGCAG  
GATAATGACATTGGAATGTGGCTCTTTCGGGAGTGTTATAGCCTTTGTTGATACTG  
CCTGCTTAGACTGAGGACTGCGCTTTTGCTAGGATGTTGGCATAATGAT

**67. *Lipomyces starkeyi* SWU-NATP 4-5**

>SWU-NATP 4-5 (544 bp)

TGCCTTAGTAACTGCGAGTGAAGCGGCAAGAGCTCAAATTTGAAATCTGGCACCT  
TCGGTGTCCGAGTTGTAATTTGTAGAAGCATCTTTTGGATTGGTCCTTGCATATGTT  
CCTTGGAACAGGACATCATAGAGGGTGAGAATCCCGTTCATGGTGGGGAATCCA  
ATTCTTTGTAAAGTGCTTTCGAAGAGTCGAGTTGTTTGGGAATGCAGCTCTAAGTG  
GGTGGTAAATTCCATCTAAAGCTAAATATTGGCGAGAGACCGATAGCGAACAAG  
TACAGTGATGGAAAGATGAAAAGAACTCCGAAAGGAGAGTGAAAAAGGACGTG  
AAATTGTTGAAAGGGAAGTGCTTGAGATCAGTCTTAAGGTTTAGTGATCAGTCTT  
CCTTTTGGTTGGTGCCTCACTATTTCTTAGGCCAACATCAGTTTTGGCGGCAGGA  
TAATGACATTGGAATGTGGCTCTTTCGGGAGTGTTATAGCCTTTGTTGATACTGCC  
TGCTTAGACTGAGGACTGCGCTTTTGCTAGGATGTTGGCATAATGATC

**68. *Lipomyces starkeyi* SWU-NAP 10-1**

>SWU-NAP 10-1 (553 bp)

GGATTGCCTTAGTAACTGCGAGTGAAGCGGCAAGAGCTCAAATTTGAAATCTGGC  
ACCTTCGGTGTCCGAGTTGTAATTTGTAGAAGCATCTTTTGGATTGGTCCTTGCAT  
ATGTTCTTGGAAACAGGACATCATAGAGGGTGAGAATCCCGTTCATGGTGGGGA  
ATCCAATTCTTTGTAAAGTGCTTTCGAAGAGTCGAGTTGTTTGGGAATGCAGCTCT  
AAGTGGGTGGTAAATTCCATCTAAAGCTAAATATTGGCGAGAGACCGATAGCGA  
ACAAGTACAGTGATGGAAAGATGAAAAGAACTCCGAAAGGAGAGTGAAAAAGG  
ACGTGAAATTGTTGAAAGGGAAGTGCTTGAGATCAGTCTTAAGGTTTAGTGATCA  
GTCTTCCTTTTGGTTGGTGCCTCACTATTTCTTAGGCCAACATCAGTTTTGGCGGC  
AGGATAATGACATTGGAATGTGGCTCTTTCGGGAGTGTTATAGCCTTTGTTGATAC  
TGCCTGCTTAGACTGAGGACTGCGCTTTTGCTAGGATGTTGGCATAATGATCTTAA  
G

**69. *Lipomyces tetrasporus* SWU-NAP 5-1-2**

>SWU-NAP 5-1-2 (546 bp)

AGGGATTGCCTTAGTAACTGCGAGTGAAGCGGCAAGAGCTCAAATTTGAAATCT  
GGCACCTTCGGTGTCCGAGTTGTAATTTGTAGAAGCATCTTTTGGATTGGTCCTTG  
CATATGTTCTTGGAAACAGGACATCATAGAGGGTGAGAATCCCGTTCATGGTGGG  
GAATCCAATTCTTTGTAAAGTGCTTTCGAAGAGTCGAGTTGTTTGGGAATGCAGCT  
CTAAGTGGGTGGTAAATTCCATCTAAAGCTAAATATTGGCGAGAGACCGATAGC  
GAACAAGTACAGTGATGGAAAGATGAAAAGAACTCCGAAAGGAGAGTGAAAAA  
GGACGTGAAATTGTTGAAAGGGAAGTGCTTGAGATCAGTCTTAAGGTTTAGTGAT  
CAGTCTTCCTTTTGGTTGGTGCCTCACTATTTCTTAGGCCAACATCAGTTTTCGCG  
GCAGGATAATGACATTGGAATGTGGCTCTTTCGGGAGTGTTATAGCCTTTGTTGAT  
ACTGCCTGCTTAGACTGAGGACCGCGCTTTTGCTAGGATGTTGGCATAAT

**70. *Lipomyces starkeyi* SWU-NAPui 2-1**

>SWU-NAPui 2-1 (553 bp)

TTGCCTTAGTAACTGCGAGTGAAGCGGCAAGAGCTCAAATTTGAAATCTGGCACC  
TTCGGTGTCCGAGTTGTAATTTGTAGAAGCATCTTTTGGATTGGTCCTTGCATATGT  
TCCTTGGAAACAGGACATCATAGAGGGTGAGAATCCCGTTCATGGTGGGGAATCC  
AATTCTCTGTAAAGTGCTTTCGAAGAGTCGAGTTGTTTGGGAATGCAGCTCTAAGT  
GGGTGGTAAATTCCATCTAAAGCTAAATATTGGCGAGAGACCGATAGCGAACAA

GTACAGTGATGGAAAGATGAAAAGAACTCCGAAAGGAGAGTGAAAAAGGACGT  
GAAATTGTTGAAAGGGAAGTGCTTGAGATCAGTCTTAAGGTTTAGTGATCAGTCT  
TCCTTTTGGTTGGTGCACCTCACTATTTCTTAGGCCAACATCAGTTTTGGCGGCAGG  
ATAATGACATTGGAATGTGGCTCTTTCGGGAGTGTTATAGCCTTTGTTGATACTGC  
CTGCTTAGACTGAGGACTGCGCTTTTGCTAGGATGTTGGCATAATGATCTTA  
GATCT

**71. *Lipomyces starkeyi* SWU-NATP 5-10-2**

>SWU-NATP 5-10-2 (549 bp)

TGCCTTAGTAAGTGCAGAGTGAAAGCGGCAAGAGCTCAAATTTGAAATCTGGCACCT  
TCGGTGTCCGAGTTGTAATTTGTAGAAGCATCTTTTGGATTGGTCCTTGCATATGTT  
CCTTGGAACAGGACATCATAGAGGGTGAGAATCCCGTTCATGGTGGGGAATCCA  
ATTCCTTTGTAAAGTGCTTTCGAAGAGTCGAGTTGTTTGGGAATGCAGCTCTAAGTG  
GGTGGTAAATTCCATCTAAAGCTAAATATTGGCGAGAGACCGATAGCGAACAAG  
TACAGTGATGGAAAGATGAAAAGAACTCCGAAAGGAGAGTGAAAAAGGACGTG  
AAATTGTTGAAAGGGAAGTGCTTGAGATCAGTCTTAAGGTTTAGTGATCAGTCTT  
CCTTTTGGTTGGTGCACCTCACTATTTCTTAGGCCAACATCAGTTTTGGCGGCAGGA  
TAATGACATTGGAATGTGGCTCTTTCGGGAGTGTTATAGCCTTTGTTGATACTGCT  
TGCTTAGACTGAGGACTGCGCTTTTGCTAGGATGTTGGCATAATGATCTTAAG

**72. *Saitozyma podzolica* SWU-NGP 5-10-2**

>SWU-NGP 5-10-2 (574 bp)

CAAGGATTCCCTTAGTAGCGGCGAGCGAAGCGGGAAGAGCTCAAATTTGAAAGC  
TGGCGTCCTACGGGCGTCCGCATTGTAATCTATAGAGGCGTTTTCTGTGCTGGACC  
GTGTCCAAGTCCCTTGGAACAGGGTATCAAAGAGGGTGACAATCCCGTACTTGAC  
ACGACAACCAGTGCTCTGTGATACGTCTTCTACGAGTCGAGTTGTTTGGGAATGC  
AGCTCAAAATGGGTGGTGAATTCCATCTAAAGCTAAATATTGGCGAGAGACCGA  
TAGCGAACAAGTACCGTGAGGGAAAGATGAAAAGCACTTTGGAAAGAGAGTTA  
AACAGTATGTGAAATTGTTGAAAGGGAACGATGGAGGTCAGTCGTGTCTGTGG  
GATTCAGCCGTCTCTGGCGGTGTACTTCCCACAGACGGGTCAACATCAGTTTTGG  
CTGGCGGATAAAGGCAGGAGGAAGGTGGCACCCCCGGGTGTGTTATAGCCTCTT  
GTTGCATACGCTGGCTGAGACTGAGGAATGCAGCTCGCCTTTATGGCCGGGGTTC  
GCCCACGTTTCGAGCTTAGGATGTTGACAT

**73. *Papiliotrema terrestris* SWU-NAP 12-1-12**

>SWU-NAP 12-1-12 (562 bp)

CTAGTAACGGCGAGTGAACCGGGAAGAGCTCAAATTTGAAATCTGGCGTGCTCA  
GTGCGTCCGAGTTGTAATCTATAGAGGCGTTTTCCGTGCCGGACTGTGTCTAAGTC  
CCTTGGAACAGGGTATCAAAGAGGGTGATAATCCCGTACTTGACACAATGACCG  
GTGCTCTGTGATACGTCTTCTACGAGTCGAGTTGTTTGGGAATGCAGCTCAAAATG  
GGTGGTGAGTTCCATCTAAAGCTAAATATTGGCGAGAGACCGATAGCGAACAAG  
TACCGTGAGGGAAAGATGAAAAGCACTTTGGAAAGAGAGTTAAACAGTACGTGA  
AATTGTTGAAAGGGAAACGATTGAAGTCAGTCGTGACTGAGAGGCTCAGCCGGT  
TCTGCCGGTGTATTCCCCTCAGTCGGGTCAACATCAGTTTTGTTCCGGTGGATAAGG  
GCAGCTGGAAGGTGGCACCTCCGGGTGTGTTATAGCCAGCTGTCGCATACATCGA  
ATGAGACTGAGGAATGCAGCTCGCCTTTATGGCCGGGGTTCGCCCACGTCCGAGC  
TTAGGATGTTGACA

**74. *Papiliotrema terrestris* SWU-NAP 12-1-1**

>SWU-NAP 12-1-1 (579 bp)

GGATTCCCCTAGTAACGGCGAGTGAACCGGGAAGAGCTCAAATTTGAAATCTGG  
CGTGCTCAGTGCGTCCGAGTTGTAATCTATAGAGGCGTTTTCCGTGCCGGACTGTG  
TCTAAGTCCCTTGGAACAGGGTATCAAAGAGGGTGATAATCCCGTACTTGACACA  
ATGACCGGTGCTCTGTGATACGTCTTCTACGAGTCGAGTTGTTTGGGAATGCAGCT  
CAAAATGGGTGGTGAGTTCCATCTAAAGCTAAATATTGGCGAGAGACCGATAGC  
GAACAAGTACCGTGAGGGAAAGATGAAAAGCACTTTGGAAAGAGAGTTAAACA  
GTACGTGAAATTGTTGAAAGGGAAACGATTGAAGTCAGTCGTGACTGAGAGGCT  
CAGCCGGTTCTGCCGGTGTATTCCCCTCAGTCGGGTCAACATCAGTTTTGTTCCGGT  
GGATAAGGGCAGCTGGAAGGTGGCACCTCCGGGTGTGTTATAGCCAGCTGTCGC  
ATACATCGAATGAGACTGAGGAATGCAGCTCGCCTTTATGGCCGGGGTTCGCCCCA  
CGTCCGAGCTTAGGATGTTGACATAATGGCTT

**75. *Lipomyces starkeyi* SWU-NGTP 4-4**

>SWU-NGTP 4-4 (548 bp)

TTGCCTTAGTAAGTGAAGCGGCAAGAGCTCAAATTTGAAATCTGGCACC  
TTCGGTGTCCGAGTTGTAATTTGTAGAAGCATCTTTTGGATTGGTCCTTGATATGT  
TCCTTGGAACAGGACATCATAGAGGGTGAGAATCCCGTTCATGGTGGGGAATCC  
AATTCTTTGTAAAGTGCTTTCGAAGAGTCGAGTTGTTTGGGAATGCAGCTCTAAGT

GGGTGGTAAATTCCATCTAAAGCTAAATATTGGCGAGAGACCGATAGCGAACAA  
GTACAGTGATGGAAAGATGAAAAGAAGCTCCGAAAGGAGAGTGAAAAAGGACGT  
GAAATTGTTGAAAGGGAAGTGCTTGAGATCAGTCTTAAGGTTTAGTGATCAGTCT  
TCCTTTTGGTTGGTGCACCTACTATTTCTTAGGCCAACATCAGTTTTGGCGGCAGG  
ATAATGACATTGGAATGTGGCTCTTTCGGGAGTGTTATAGCCTTTGTTGATACTGC  
CTGCTTAGACAGAGGACTGCGCTTTTGCTAGGATGTTGGCATAATGATCTTA

**76. *Lipomyces tetrasporus* SWU-NGP 3-6**

>SWU-NGP 3-6 (550 bp)

TTGCCTTAGTAACTGCGAGTGAAGCGGCAAGAGCTCAAATTTGAAATCTGGCACC  
TTCGGTGTCCGAGTTGTAATTTGTAGAAGCATCTTTTGGATTGGTCCTTGCATATGT  
TCCTTGGAACAGGACATCATAGAGGGTGAGAATCCCGTTCATGGTGGGGAATCC  
AATTCCTTTGTAAAGTGCTTTCGAAGAGTCGAGTTGTTTGGGAATGCAGCTCTAAGT  
GGGTGGTAAATTCCATCTAAAGCTAAATATTGGCGAGAGACCGATAGCGAACAA  
GTACAGTGATGGAAAGATGAAAAGAAGCTCCGAAAGGAGAGTGAAAAAGGACGT  
GAAATTGTTGAAAGGGAAGTGCTTGAGATCAGTCTTAAGGTTTAGTGATCAGTCT  
TCCTTTTGGTTGGTGCACCTACTATTTCTTAGGCCAACATCAGTTTTCGCGGCAGG  
ATAATGACATTGGAATGTGGCTCTTTCGGGAGTGTTATAGCCTTTGTTGATACTGC  
CTGCTTAGACTGAGGACCGCGCTTTTGCTAGGATGTTGGCATAATGATCTTAAG

**77. *Lipomyces tetrasporus* SWU-NGP 5-4-1**

>SWU-NGP 5-4-1 (544 bp)

GCCTTAGTAACTGCGAGTGAAGCGGCAAGAGCTCAAATTTGAAATCTGGCACCTT  
CGGTGTCCGAGTTGTAATTTGTAGAAGCATCTTTTGGATTGGTCCTTGCATATGTTC  
CTTGGAACAGGACATCATAGAGGGTGAGAATCCCGTTCATGGTGGGGAATCCAA  
TTCTTTGTAAAGTGCTTTCGAAGAGTCGAGTTGTTTGGGAATGCAGCTCTAAGTGG  
GTGGTAAATTCCATCTAAAGCTAAATATTGGCGAGAGACCGATAGCGAACAAAGT  
ACAGTGATGGAAAGATGAAAAGAAGCTCCGAAAGGAGAGTGAAAAAGGACGTGA  
AATTGTTGAAAGGGAAGTGCTTGAGATCAGTCTTAAGGTTTAGTGATCAGTCTTCC  
TTTTGGTTGGTGCACCTACTATTTCTTAGGCCAACATCAGTTTTCGCGGCAGGATA  
ATGACATTGGAATGTGGCTCTTTCGGGAGTGTTATAGCCTTTGTTGATACTGCCTG  
CTTAGACTGAGGACCGCGCTTTTGCTAGGATGTTGGCATAATGATCT



**78. *Lipomyces starkeyi* SWU-NATP 4-3**

>SWU-NATP 4-3 (556 bp)

AACAGGGATTGCCTTAGTAAGTGCAGAGTGAAGCGGCAAGAGCTCAAATTTGAAA  
TCTGGCACCTTCGGTGTCCGAGTTGTAATTTGTAGAAGCATCTTTTGGATTGGTCCT  
TGCATATGTTCCCTTGGAACAGGACATCATAGAGGGTGAGAATCCCGTTCATGGTG  
GGGAATCCAATTCTTTGTAAAGTGCTTTTGAAGAGTCGAGTTGTTTGGGAATGCA  
GCTCTAAGTGGGTGGTAAATTCCATCTAAAGCTAAATATTGGCGAGAGACCGATA  
GCGAACAAGTACAGTGATGGAAAGATGAAAAGAACTCCGAAAGGAGAGTGAAA  
AAGGACGTGAAATTGTTGAAAGGGAAGTGCTTGAGATCAGTCTTAAGGTTTAGTG  
ATCAGTCTTCCTTTTGGTTGGTGCCTCACTATTTCTTAGGCCAACATCAGTTTTGG  
CGGCAGGATAATGACATTGGAATGTGGCTCTTTCGGGAGTGTTATAGCCTTTGTTG  
ATACTGCCTGCTTAGACTGAGGACTGCGCTTTTGCTAGGATGTTGGCATAATGATC  
TTA

**79. *Lipomyces starkeyi* SWU-NAP 14-4**

>SWU-NAP 14-4 (547 bp)

CCTTAGTAAGTGCAGAGTGAAGCGGCAAGAGCTCAAATTTGAAATCTGGCACCTTC  
GGTGTCCGAGTTGTAATTTGTAGAAGCATCTTTTGGATTGGTCCTTGCATATGTTCC  
TTGGAACAGGACATCATAGAGGGTGAGAATCCCGTTCATGGTGGGGAATCCAAT  
TCTTTGTAAAGTGCTTTTGAAGAGTCGAGTTGTTTGGGAATGCAGCTCTAAGTGGG  
TGGTAAATTCCATCTAAAGCTAAATATTGGCGAGAGACCGATAGCGAACAAGTA  
CAGTGATGGAAAGATGAAAAGAACTCCGAAAGGAGAGTGAAAAAGGACGTGAA  
ATTGTTGAAAGGGAAGTGCTTGAGATCAGTCTTAAGGTTTAGTGATCAGTCTTCCT  
TTTGGTTGGTGCCTCACTATTTCTTAGGCCAACATCAGTTTTGGCGGCAGGATAA  
TGACATTGGAATGTGGCTCTTTCGGGAGTGTTATAGCCTTTGTTGATACTGCCTGC  
TTAGACAGAGGACTGCGCTTTTGCTAGGATGTTGGCATAATGATCTTAAG

**80. *Lipomyces tetrasporus* SWU-NGP 2-5**

>SWU-NGP 2-5 (550 bp)

GCCTTAGTAAGTGCAGAGTGAAGCGGCAAGAGCTCAAATTTGAAATCTGGCACCTT  
CGGTGTCCGAGTTGTAATTTGTAGAAGCATCTTTTGGATTGGTCCTTGCATATGTTC  
CTTGGAACAGGACATCATAGAGGGTGAGAATCCCGTTCATGGTGGGGAATCCAA  
TTCTTTGTAAAGTGCTTTTGAAGAGTCGAGTTGTTTGGGAATGCAGCTCTAAGTGG  
GTGGTAAATTCCATCTAAAGCTAAATATTGGCGAGAGACCGATAGCGAACAAGT

ACAGTGATGGAAAGATGAAAAGAACTCCGAAAGGAGAGTGAAAAAGGACGTGA  
AATTGTTGAAAGGGAAGTGCTTGAGATCAGTCTTAAGGTTTAGTGATCAGTCTTCC  
TTTTGGTTGGTGCACCTCACTATTTCTTAGGCCAACATCAGTTTTCGCGGCAGGATA  
ATGACATTGGAATGTGGCTCTTTTCGGGAGTGTTATAGCCTTTGTTGATACTGCCTG  
CTTAGACTGAGGACCGCGCTTTTGCTAGGATGTTGGCATAATGATCTTAAGCA

**81. *Lipomyces tetrasporus* SWU-NGP 2-6-2**

>SWU-NGP 2-6-2 (560 bp)

CAGGGATTGCCTTAGTAACTGCGAGTGAAGCGGCAAGAGCTCAAATTTGAAATCT  
GGCACCTTCGGTGTCCGAGTTGTAATTTGTAGAAGCATCTTTTGGATTGGTCCTTG  
CATATGTTTCCTTGGAACAGGACATCATAGAGGGTGAGAATCCCGTTCATGGTGGG  
GAATCCAATTCTTTGTAAAGTGCTTTTCGAAGAGTCGAGTTGTTTGGGAATGCAGCT  
CTAAGTGGGTGGTAAATTCCATCTAAAGCTAAATATTGGCGAGAGACCGATAGC  
GAACAAGTACAGTGATGGAAAGATGAAAAGAACTCCGAAAGGAGAGTGAAAAA  
GGACGTGAAATTGTTGAAAGGGAAGTGCTTGAGATCAGTCTTAAGGTTTAGTGAT  
CAGTCTTCCTTTTGGTTGGTGCACCTCACTATTTCTTAGGCCAACATCAGTTTTCGCG  
GCAGGATAATGACATTGGAATGTGGCTCTTTTCGGGAGTGTTATAGCCTTTGTTGAT  
ACTGCCTGCTTAGACTGAGGACCGCGCTTTTGCTAGGATGTTGGCATAATGATCTT  
AAGCAGC

**82. *Lipomyces starkeyi* SWU-NGP 5-3-3**

>SWU-NGP 5-3-3 (499 bp)

GGCACCTTCGGTGTCCGAGTTGTAATTTGTAGAAGCATCTTTTGGATTGGTCCTTG  
CATATGTTTCCTTGGAACAGGACATCATAGAGGGTGAGAATCCCGTTCATGGTGGG  
GAATCCAATTCTTTGTAAAGTGCTTTTCGAAGAGTCGAGTTGTTTGGGAATGCAGCT  
CTAAGTGGGTGGTAAATTCCATCTAAAGCTAAATATTGGCGAGAGACCGATAGC  
GAACAAGTACAGTGATGGAAAGATGAAAAGAACTCCGAAAGGAGAGTGAAAAA  
GGACGTGAAATTGTTGAAAGGGAAGTGCTTGAGATCAGTCTTAAGGTTTAGTGAT  
CAGTCTTCCTTTTGGTTGGTGCACCTCACTATTTCTTAGGCCAACATCAGTTTTGGCG  
GCAGGATAATGACATTGGAATGTGGCTCTTTTCGGGAGTGTTATAGCCTTTGTTGAT  
ACTGCCTGCTTAGACTGAGGACTGCGCTTTTGCTAGGATGTTGGCATAATGATCTT  
A

**83. *Lipomyces starkeyi* SWU-NGP 5-10-8**

>SWU-NGP 5-10-8 (552 bp)

AGGGATTGCCTTAGTAACTGCGAGTGAAGCGGCAAGAGCTCAAATTTGAAATCT  
GGCACCTTCGGTGTCCGAGTTGTAATTTGTAGAAGCATCTTTTGGATTGGTCCTTG  
CATATGTTTCCTTGGAACAGGACATCATAGAGGGTGAGAATCCCGTTCATGGTGGG  
GAATCCAATTCTTTGTAAAGTGCTTTTCGAAGAGTCGAGTTGTTTGGGAATGCAGCT  
CTAAGTGGGTGGTAAATTCCATCTAAAGCTAAATATTGGCGAGAGACCGATAGC  
GAACAAGTACAGTGATGGAAAGATGAAAAGAACTCCGAAAGGAGAGTGAAAAA  
GGACGTGAAATTGTTGAAAGGGAAGTGCTTGAGATCAGTCTTAAGGTTTAGTGAT  
CAGTCTTCCTTTTGGTTGGTGCACCTACTATTTCTTAGGCCAACATCAGTTTTGGCG  
GCAGGATAATGGCATTGGAATGTGGCTCTTTCGGGAGTGTTATAGCCTTTGTTGAT  
ACTGCCTGCTTAGACTGAGGACTGCGCTTTTGCTAGGATGTTGGCATAATGATCTT

**84. *Lipomyces tetrasporus* SWU-NGTP 4-2**

>SWU-NGTP 4-2 (538 bp)

ATTGCCTTAGTAACTGCGAGTGAAGCGGCAAGAGCTCAAATTTGAAATCTGGCAC  
CTTCGGTGTCCGAGTTGTAATTTGTAGAAGCATCTTTTGGATTGGTCCTTGCATATG  
TTCCTTGGAACAGGACATCATAGAGGGTGAGAATCCCGTTCATGGTGGGGAATCC  
AATTCTTTGTAAAGTGCTTTTCGAAGAGTCGAGTTGTTTGGGAATGCAGCTCTAAGT  
GGGTGGTAAATTCCATCTAAAGCTAAATATTGGCGAGAGACCGATAGCGAACAA  
GTACAGTGATGGAAAGATGAAAAGAACTCCGAAAGGAGAGTGAAAAAGGACGT  
GAAATTGTTGAAAGGGAAGTGCTTGAGATCAGTCTTAAGGTTTAGTGATCAGTCT  
TCCTTTTGGTTGGTGCACCTACTATTTCTTAGGCCAACATCAGTTTTCGCGGCAGG  
ATAATGACATTGGAATGTGGCTCTTTCGGGAGTGTTATAGCCTTTGTTGATACTGC  
CTGCTTAGACTGAGGACCGCGCTTTTGCTAGGATGTTGGCA

**85. *Lipomyces starkeyi* SWU-NGP 14-3-1**

>SWU-NGP 14-3-1 (498 bp)

CACCTTCGGTGTCCGAGTTGTAATTTGTAGAAGCATCTTTTGGATTGGTCCTTGCAT  
ATGTTTCCTTGGAACAGGACATCATAGAGGGTGAGAATCCCGTTCATGGTGGGGA  
ATCCAATTCTTTGTAAAGTGCTTTTCGAAGAGTCGAGTTGTTTGGGAATGCAGCTCT  
AAGTGGGTGGTAAATTCCATCTAAAGCTAAATATTGGCGAGAGACCGATAGCGA  
ACAAGTACAGTGATGGAAAGATGAAAAGAACTCCGAAAGGAGAGTGAAAAAGG

ACGTGAAATTGTTGAAAGGGAAGTGCTTGAGATCAGTCTTAAGGTTTAGTGATCA  
GTCTTCCTTTTGGTTGGTGCACCTCACTATTTCTTAGGCCAACATCAGTTTTGGCGGC  
AGGATAATGACATTGGAATGTGGCTCTTTCGGGACTGTTATAGCCTTTGTTGATAC  
TGCCAGCTGATACAGACGACGGCGCTTTTGCTAGGATGTTGGCATAATGATCTTA  
A

**86. *Rhodotorula mucilaginosa* SWU-NGP 14-3-3**

>SWU-NGP 14-3-3 (500 bp)

GCACCTTCGGTGTCCGAGTTGTAATCTCTAGAAATGTTTTCCGCGTTGGACCGCAC  
ACAAGTCTGTTGGAATACAGCGGCATAGTGGTGAGACCCCCGTATATGGTGCGG  
ACGCCCAGCGCTTTGTGATACATTTTCGAAGAGTCGAGTTGTTTGGGAATGCAGC  
TCAAATTGGGTGGTAAATTCCATCTAAAGCTAAATATTGGCGAGAGACCGATAGC  
GAACAAGTACCGTGAGGGAAAGATGAAAAGCACTTTGGAAAGAGAGTTAACAG  
TACGTGAAATTGTTGGAAGGGAAACGCTTGAAGTCAGACTTGCTTGCTGAGCAAT  
CGGTTTGCAGGCCAGCATCAGTTTTCCGGGATGGATAATGGTAGAGAGAAGGTA  
GCAGTTTCGGCTGTGTTATAGCTCTCTGCTGGATACATCTTGGGGGACTGAGGAAC  
GCAGTGTGCCTTTGGCGGGGGTTTCGACCTCTTCACACTTAGGATGCTGGTGGAAT  
GGCTTT

**87. *Lipomyces starkeyi* SWU-NGP 1-5-4**

>SWU-NGP 1-5-4 (554 bp)

AGGGATTGCCTTAGTAAGTGCAGTGAAAGCGGCAAGAGCTCAAATTTGAAATCT  
GGCACCTTCGGTGTCCGAGTTGTAATTTGTAGAAGCATCTTTTGGATTGGTCCTTG  
CATATGTTTCCTTGGAACAGGACATCATAGAGGGTGAGAATCCCGTTCATGGTGGG  
GAATCCAATTCTTTGTAAAGTGCTTTCGAAGAGTCGAGTTGTTTGGGAATGCAGCT  
CTAAGTGGGTGGTAAATTCCATCTAAAGCTAAATATTGGCGAGAGACCGATAGC  
GAACAAGTACAGTGATGGAAAGATGAAAAGAACTCCGAAAGGAGAGTGAAAAA  
GGACGTGAAATTGTTGAAAGGGAAGTGCTTGAGATCAGTCTTAAGGTTTAGTGAT  
CAGTCTTCCTTTTGGTTGGTGCACCTCACTATTTCTTAGGCCAACATCAGTTTTGGCG  
GCAGGATAATGACATTGGAATGTGGCTCTTTCGGGAGTGTTATAGCCTTTGTTGAT  
ACTGCCAGCTGATACAGACGACGGCGCTTTTGCTAGGATGTTGGCATAATGATCT  
TAA

**88. *Lipomyces starkeyi* SWU-NGTP 4-12-1**

>SWU-NGTP 4-12-1 (498 bp)

CACCTTCGGTGTCCGAGTTGTAATTTGTAGAAGCATCTTTTGGATTGGTCCTTGCAT  
ATGTTCTTGGAAACAGGACATCACTGAGGGTGAGAATCCCGTTCATGGTGGGGAA  
TCCAATTCTTTGTAAAGTGCTTTCGAAGAGTCGAGTTGTTTGGGAATGCAGCTCTA  
AGTGGGTGGTAAATTCCATCTAAAGCTAAATATTGGCGAGAGACCGATAGCGAA  
CAAGTACAGTGATGGAAAGATGAAAAGAAGTCCGAAAGGAGAGTGAAAAAGGA  
CGTGAAATTGTTGAAAGGGAAGTGCTTGAGATCAGTCTTAAGGTTTAGTGATCAG  
TCTTCCTTTTGGTTGGTGCCTCACTATTTCTTAGGCCAACATCAGTTTTGGCGGCA  
GGATAATGACATTGGAATGTGGCTCTTTCGGGAGTGTTATAGCCTTTGTTGATACT  
GCCAGCTGATACAGACGACGGCGCTTTTGCTAGGATGTTGGCATAATGATCTTAA

**89. *Saitozyma podzolica* SWU-NGP 5-4-2**

>SWU-NGP 5-4-2 (570 bp)

TTCCCTTAGTAGCGGCGAGCGAAGCGGGAAGAGCTCAAATTTGAAAGCTGGCGT  
CCTACGGGCGTCCGCATTGTAATCTATAGAGGCGTTTTCTGTGCTGGACCGTGTCC  
AAGTCCCTTGGAACAGGGTATCAAAGAGGGTGACAATCCCGTACTTGACACGAC  
AACCAGTGCTCTGTGATACGTCTTCTACGAGTCGAGTTGTTTGGGAATGCAGCTCA  
AAATGGGTGGTGAATTCCATCTAAAGCTAAATATTGGCGAGAGACCGATAGCGA  
ACAAGTACCGTGAGGGAAAGATGAAAAGCACTTTGGAAAGAGAGTTAAACAGT  
ATGTGAAATTGTTGAAAGGGAACGATGGAGGTCAGTCGTGTCTGTGGGATTGAG  
CCGTCTCTGGCGGTGTACTTCCCACAGACGGGTCAACATCAGTTTTGGCTGGCGG  
ATAAAGGCAGGAGGAAGGTGGCACCCCCGGGTGTGTTATAGCCTCTTGTTGCATA  
CGCTGGCTGAGACTGAGGAATGCAGCTCGCCTTTATGGCCGGGGTTCGCCCCAGT  
TCGAGCTTAGGATGTTGACATAA

**90. *Lipomyces tetrasporus* SWU-NGP 5-6-1**

>SWU-NGP 5-6-1 (545 bp)

CCTTAGTAACTGCGAGTGAAGCGGCAAGAGCTCAAATTTGAAATCTGGCACCTTC  
GGTGTCCGAGTTGTAATTTGTAGAAGCATCTTTTGGATTGGTCCTTGCATATGTTCC  
TTGGAACAGGACATCATAGAGGGTGAGAATCCCGTTCATGGTGGGGAATCCAAT  
TCTTTGTAAAGTGCTTTCGAAGAGTCGAGTTGTTTGGGAATGCAGCTCTAAGTGGG  
TGGTAAATTCCATCTAAAGCTAAATATTGGCGAGAGACCGATAGCGAACAAGTA  
CAGTGATGGAAAGATGAAAAGAAGTCCGAAAGGAGAGTGAAAAAGGACGTGAA

ATTGTTGAAAGGGAAGTGCTTGAGATCAGTCTTAAGGTTTAGTGATCAGTCTTCCT  
TTTGGTTGGTGCCTCACTATTTCTTAGGCCAACATCAGTTTTTCGCGGCAGGATAA  
TGACATTGGAATGTGGCTCTTTCGGGAGTGTTATAGCCTTTGTTGATACTGCCTGC  
TTAGACTGAGGACCGCGCTTTTGCTAGGATGTTGGCATAATGATCTTA

**91. *Lipomyces tetrasporus* SWU-NGP 1-1**

>SWU-NGP 1-1 (500 bp)

GCCTTAGTAACTGCGAGTGAAGCGGCAAGAGCTCAAATTTGAAATCTGGCACCTT  
CGGTGTCCGAGTTGTAATTTGTAGAAGCATCTTTTGGATTGGTCCTTGCATATGTTC  
CTTGGAACAGGACATCATAGAGGGTGAGAATCCCGTTCATGGTGGGGAATCCAA  
TTCTTTGTAAAGTGCTTTCGAAGAGTCGAGTTGTTTGGGAATGCAGCTCTAAGTGG  
GTGGTAAATTCCATCTAAAGCTAAATATTGGCGAGAGACCGATAGCGAACAAGT  
ACAGTGATGGAAAGATGAAAAGAACTCCGAAAGGAGAGTGAAAAAGGACGTGA  
AATTGTTGAAAGGGAAGTGCTTGAGATCAGTCTTAAGGTTTAGTGATCAGTCTTCC  
TTTTGGTTGGTGCCTCACTATTTCTTAGGCCAACATCAGTTTTTCGCGGCAGGATA  
ATGACATTGGAATGTGGCTCTTTCGGGAGTGTTATAGCCTTTGTTGATACTGCCTG  
CTT

**92. *Lipomyces tetrasporus* SWU-NGP 3-2**

>SWU-NGP 3-2 (459 bp)

TTGGATTGGTCCTTGCATATGTTCCCTTGGAACAGGACATCATAGAGGGTGAGAAT  
CCCGTTCATGGTGGGGAATCCAAATTCCTTTGTAAAGTGCTTTCGAAGAGTCGAGTTG  
TTTGGGAATGCAGCTCTAAGTGGGTGGTAAATTCCATCTAAAGCTAAATATTGGC  
GAGAGACCGATAGCGAACAAGTACAGTGATGGAAAGATGAAAAGAACTCCGAA  
AGGAGAGTGAAAAAGGACGTGAAATTGTTGAAAGGGAAGTGCTTGAGATCAGTC  
TTAAGGTTTAGTGATCAGTCTTCCTTTTGGTTGGTGCCTCACTATTTCTTAGGCCA  
ACATCAGTTTTTCGCGGCAGGATAATGACATTGGAATGTGGCTTTTTCCGGGAGTGT  
TATAGCCTTTGTTGATACTGCCTGCTTAGACTGAGGACCGCGCTTTTGCTAGGATG  
TTGGCATAATGATCTTA

**93. *Lipomyces tetrasporus* SWU-NGP 3-1**

>SWU-NGP 3-1 (551 bp)

GGATTGCCTTAGTAACTGCGAGTGAAGCGGCAAGAGCTCAAATTTGAAATCTGGC  
ACCTTCGGTGTCCGAGTTGTAATTTGTAGAAGCATCTTTTGGATTGGTCCTTGCAT

ATGTTTCCTTGGAACAGGACATCATAGAGGGTGAGAATCCCGTTCATGGTGGGGA  
ATCCAATTCTTTGTAAAGTGCTTTCGAAGAGTCGAGTTGTTTGGGAATGCAGCTCT  
AAGTGGGTGGTAAATTCCATCTAAAGCTAAATATTGGCGAGAGACCGATAGCGA  
ACAAGTACAGTGATGGAAAGATGAAAAGAACTCCGAAAGGAGAGTGAAAAAGG  
ACGTGAAATTGTTGAAAGGGAAGTGCTTGAGATCAGTCTTAAGGTTTAGTGATCA  
GTCTTCCTTTTGGTTGGTGCCTCACTATTTCTTAGGCCAACATCAGTTTTTCGCGGC  
AGGATAATGACATTGGAATGTGGCTCTTTCGGGAGTGTTATAGCCTTTGTTGATAC  
TGCCTGCTTAGACTGAGGACCGCGCTTTTGCTAGGATGTTGGCATAATGATCTTA

**94. *Lipomyces tetrasporus* SWU-NGP 6-3**

>SWU-NGP 6-3 (559 bp)

AACAGGGATTGCCTTAGTAAGTGCAGTGGAAGCGGCAAGAGCTCAAATTTGAAA  
TCTGGCACCTTCGGTGTCCGAGTTGTAATTTGTAGAAGCATCTTTTGGATTGGTCCT  
TGCATATGTTTCCTTGGAACAGGACATCATAGAGGGTGAGAATCCCGTTCATGGTG  
GGGAATCCAATTCTTTGTAAAGTGCTTTCGAAGAGTCGAGTTGTTTGGGAATGCA  
GCTCTAAGTGGGTGGTAAATTCCATCTAAAGCTAAATATTGGCGAGAGACCGATA  
GCGAACAAGTACAGTGATGGAAAGATGAAAAGAACTCCGAAAGGAGAGTGAAA  
AAGGACGTGAAATTGTTGAAAGGGAAGTGCTTGAGATCAGTCTTAAGGTTTAGTG  
ATCAGTCTTCCTTTTGGTTGGTGCCTCACTATTTCTTAGGCCAACATCAGTTTTCG  
CGGCAGGATAATGACATTGGAATGTGGCTCTTTCGGGAGTGTTATAGCCTTTGTTG  
ATACTGCCTGCTTAGACTGAGGACCGCGCTTTTGCTAGGATGTTGGCATAATGATC  
TTAAGC

**95. *Lipomyces tetrasporus* SWU-NGP 2-1-1**

>SWU-NGP 2-1-1 (463 bp)

TCTTTTGGATTGGTCCTTGCATATGTTTCCTTGGAACAGGACATCATAGAGGGTGAG  
AATCCCGTTCATGGTGGGGAATCCAATTCTTTGTAAAGTGCTTTCGAAGAGTCGA  
GTTGTTTGGGAATGCAGCTCTAAGTGGGTGGTAAATTCCATCTAAAGCTAAATATT  
GGCGAGAGACCGATAGCGAACAAGTACAGTGATGGAAAGATGAAAAGAACTCC  
GAAAGGAGAGTGAAAAAGGACGTGAAATTGTTGAAAGGGAAGTGCTTGAGATC  
AGTCTTAAGGTTTAGTGATCAGTCTTCCTTTTGGTTGGTGCCTCACTATTTCTTAG  
GCCAACATCAGTTTTTCGCGGCAGGATAATGACATTGGAATGTGGCTCTTTCGGGA  
GTGTTATAGCCTTTGTTGATACTGCCTGCTTAGACTGAGGACCGCGCTTTTGCTAG  
GATGTTGGCATAATGATCTTAA

**96. *Lipomyces starkeyi* SWU-NGTP 4-12-3**

>SWU-NGTP 4-12-3 (450 bp)

GGTCCTTGCATATGTTCCCTTGGAACAGGACATCATAGAGGGTGAGAATCCCGTTC  
ATGGTGGGGAATCCAATTCTTTGTAAAGTGCTTTCGAAGAGTCGAGTTGTTTGGGA  
ATGCAGCTCTAAGTGGGTGGTAAATTCCATCTAAAGCTAAATATTGGCGAGAGAC  
CGATAGCGAACAAGTACAGTGATGGAAAGATGAAAAGAACTCCGAAAGGAGAG  
TGAAAAAGGACGTGAAATTGTTGAAAGGGAAGTGCTTGAGATCAGTCTTAAGGT  
TTAGTGATCAGTCTTCCTTTTGGTTGGTGCACTCACTATTTCTTAGGCCAACATCAG  
TTTTGGCGGCAGGATAATGACATTGGAATGTGGCTCTTTCGGGAGTGTTATAGCCT  
TTGTTGATACTGCCTGCTTAGACAGAGGACTGCGCTTTTGCTAGGATGTTGGCATA  
ATGATCTT

**97. *Lipomyces tetrasporus* SWU-NGP 4-4**

>SWU-NGP 4-4 (554 bp)

TTGCCTTAGTAACTGCGAGTGAAGCGGCAAGAGCTCAAATTTGAAATCTGGCACC  
TTCGGTGTCCGAGTTGTAATTTGTAGAAGCATCTTTTGGATTGGTCCTTGCATATGT  
TCCTTGGAACAGGACATCATAGAGGGTGAGAATCCCGTTTCATGGTGGGGAATCC  
AATTCCTTTGTAAAGTGCTTTCGAAGAGTCGAGTTGTTTGGGAATGCAGCTCTAAGT  
GGGTGGTAAATTCCATCTAAAGCTAAATATTGGCGAGAGACCGATAGCGAACAA  
GTACAGTGATGGAAAGATGAAAAGAACTCCGAAAGGAGAGTGAAAAAGGACGT  
GAAATTGTTGAAAGGGAAGTGCTTGAGATCAGTCTTAAGGTTTAGTGATCAGTCT  
TCCTTTTGGTTGGTGCACTCACTATTTCTTAGGCCAACATCAGTTTTCGCGGCAGG  
ATAATGACATTGGAATGTGGCTCTTTCGGGAGTGTTATAGCCTTTGTTGATACTGC  
CTGCTTAGACTGAGGACCGCGCTTTTGCTAGGATGTTGGCATAATGATCTTAAGC  
AGC

**98. *Lipomyces starkeyi* SWU-NGP 6-6**

>SWU-NGP 6-6 (560 bp)

CAGGGATTGCCTTAGTAACTGCGAGTGAAGCGGCAAGAGCTCAAATTTGAAATCT  
GGCACCTTCGGTGTCCGAGTTGTAATTTGTAGAAGCATCTTTTGGATTGGTCCTTG  
CATATGTTTCCTTGGAACAGGACATCATAGAGGGTGAGAATCCCGTTTCATGGTGGG  
GAATCCAATTCTTTGTAAAGTGCTTTCGAAGAGTCGAGTTGTTTGGGAATGCAGCT  
CTAAGTGGGTGGTAAATTCCATCTAAAGCTAAATATTGGCGAGAGACCGATAGC



GAACAAGTACAGTGATGGAAAGATGAAAAGAACTCCGAAAGGAGAGTGAAAAA  
GGACGTGAAATTGTTGAAAGGGAAGTGCTTGAGATCAGTCTTAAGGTTTAGTGAT  
CAGTCTTCCTTTTGGTTGGTGCACCTCACTATTTCTTAGGCCAACATCAGTTTTGGCG  
GCAGGATAATGACATTGGAATGTGGCTCTTTCGGGAGTGTTATAGCCTTTGTTGAT  
ACTGCCTGCTTAGACTGAGGACTGCGCTTTTGCTAGGATGTTGGCATAATGATCTT  
AAGCAGC

**99. *Lipomyces tetrasporus* SWU-NAP 4-2-2**

>SWU-NAP 4-2-2 (554 bp)

GGATTGCCTTAGTAACTGCGAGTGAAGCGGCAAGAGCTCAAATTTGAAATCTGGC  
ACCTTCGGTGTCCGAGTTGTAATTTGTAGAAGCATCTTTTGGATTGGTCCTTGCAT  
ATGTTTCCTTGGAACAGGACATCATAGAGGGTGAGAATCCCGTTCATGGTGGGGA  
ATCCAATTCTTTGTAAAGTGCTTTCGAAGAGTCGAGTTGTTTGGGAATGCAGCTCT  
AAGTGGGTGGTAAATTCCATCTAAAGCTAAATATTGGCGAGAGACCGATAGCGA  
ACAAGTACAGTGATGGAAAGATGAAAAGAACTCCGAAAGGAGAGTGAAAAAGG  
ACGTGAAATTGTTGAAAGGGAAGTGCTTGAGATCAGTCTTAAGGTTTAGTGATCA  
GTCTTCCTTTTGGTTGGTGCACCTCACTATTTCTTAGGCCAACATCAGTTTTCGCGGC  
AGGATAATGACATTGGAATGTGGCTCTTTCGGGAGTGTTATAGCCTTTGTTGATAC  
TGCCTGCTTAGACTGAGGACCGCGCTTTTGCTAGGATGTTGGCATAATGATCTTAA  
GC

**100. *Lipomyces tetrasporus* SWU-NAP 5-4**

>SWU-NAP 5-4 (555 bp)

AGGGATTGCCTTAGTAACTGCGAGTGAAGCGGCAAGAGCTCAAATTTGAAATCT  
GGCACCTTCGGTGTCCGAGTTGTAATTTGTAGAAGCATCTTTTGGATTGGTCCTTG  
CATATGTTTCCTTGGAACAGGACATCATAGAGGGTGAGAATCCCGTTCATGGTGGG  
GAATCCAATTCTTTGTAAAGTGCTTTCGAAGAGTCGAGTTGTTTGGGAATGCAGCT  
CTAAGTGGGTGGTAAATTCCATCTAAAGCTAAATATTGGCGAGAGACCGATAGC  
GAACAAGTACAGTGATGGAAAGATGAAAAGAACTCCGAAAGGAGAGTGAAAAA  
GGACGTGAAATTGTTGAAAGGGAAGTGCTTGAGATCAGTCTTAAGGTTTAGTGAT  
CAGTCTTCCTTTTGGTTGGTGCACCTCACTATTTCTTAGGCCAACATCAGTTTTCGCG  
GCAGGATAATGACATTGGAATGTGGCTCTTTCGGGAGTGTTATAGCCTTTGTTGAT  
ACTGCCTGCTTAGACTGAGGACCGCGCTTTTGCTAGGATGTTGGCATAATGATCTT  
AAG

**101. *Lipomyces starkeyi* SWU-NGP 14-1**

>SWU-NGP 14-1 (504 bp)

GCCTTAGTAACTGCGAGTGAAGCGGCAAGAGCTCAAATTTGAAATCTGGCACCTT  
CGGTGTCCGAGTTGTAATTTGTAGAAGCATCTTTTGGATTGGTCCTTGCATATGTTC  
CTTGGAACAGGACATCATAGAGGGTGAGAATCCCGTTCATGGTGGGGAATCCAA  
TTCTTTGTAAAGTGCTTTTCGAAGAGTCGAGTTGTTTGGGAATGCAGCTCTAAGTGG  
GTGGTAAATTCCATCTAAAGCTAAATATTGGCGAGAGACCGATAGCGAACAAGT  
ACAGTGATGGAAAGATGAAAAGAAGTCCGAAAGGAGAGTGAAAAAGGACGTGA  
AATTGTTGAAAGGGAAGTGCTTGAGATCAGTCTTAAGGTTTAGTGATCAGTCTTCC  
TTTTGGTTGGTGCCTCACTATTTCTTAGGCCAACATCAGTTTTGGCGGCAGGATA  
ATGACATTGGAATGTGGCTCTTTCGGGAGTGTTATAGCCTTTGTTGATACTGCCTG  
CTTAGAC

**102. *Lipomyces starkeyi* SWU-NGP 14-9**

>SWU-NGP 14-9 (557 bp)

GGGATTGCCTTAGTAACTGCGAGTGAAGCGGCAAGAGCTCAAATTTGAAATCTG  
GCACCTTCGGTGTCCGAGTTGTAATTTGTAGAAGCATCTTTTGGATTGGTCCTTGC  
ATATGTTTCCTTGGAACAGGACATCATAGAGGGTGAGAATCCCGTTCATGGTGGGG  
AATCCAATTCTTTGTAAAGTGCTTTTCGAAGAGTCGAGTTGTTTGGGAATGCAGCTC  
TAAGTGGGTGGTAAATTCCATCTAAAGCTAAATATTGGCGAGAGACCGATAGCG  
AACAAAGTACAGTGATGGAAAGATGAAAAGAAGTCCGAAAGGAGAGTGAAAAAG  
GACGTGAAATTGTTGAAAGGGAAGTGCTTGAGATCAGTCTTAAGGTTTAGTGATC  
AGTCTTCCTTTTGGTTGGTGCCTCACTATTTCTTAGGCCAACATCAGTTTTGGCGG  
CAGGATAATGACATTGGAATGTGGCTCTTTCGGGAGTGTTATAGCCTTTGTTGATA  
CTGCCTGCTTAGACTGAGGACTGCGCTTTTGCTAGGATGTTGGCATAATGATCTTA  
AGCAG

**103. *Lipomyces tetrasporus* SWU-NGP 5-9-2**

>SWU-NGP 5-9-2 (541 bp)

CTTAGTAACTGCGAGTGAAGCGGCAAGAGCTCAAATTTGAAATCTGGCACCTTCG  
GTGTCCGAGTTGTAATTTGTAGAAGCATCTTTTGGATTGGTCCTTGCATATGTTCTT  
TGGAACAGGACATCATAGAGGGTGAGAATCCCGTTCATGGTGGGGAATCCAATT  
CTTTGTAAAGTGCTTTTCGAAGAGTCGAGTTGTTTGGGAATGCAGCTCTAAGTGGGT

GGTAAATTCCATCTAAAGCTAAATATTGGCGAGAGACCGATAGCGAACAAGTAC  
AGTGATGGAAAGATGAAAAGAAGTCCGAAAGGAGAGTGAAAAAGGACGTGAAA  
TTGTTGAAAGGGAAGTGCTTGAGATCAGTCTTAAGGTTTAGTGATCAGTCTTCCTT  
TTGGTTGGTGCACCTCACTATTTCTTAGGCCAACATCAGTTTTTCGCGGCAGGATAAT  
GACATTGGAATGTGGCTCTTTCGGGAGTGTTATAGCCTTTGTTGATACTGCCTGCT  
TAGACTGAGGACCGCGCTTTTGCTAGGATGTTGGCATAATGATC

**104. *Lipomyces starkeyi* SWU-NGTP 5-8**

>SWU-NGTP 5-8 (544 bp)

ATTGCCTTAGTAACTGCGAGTGAAGCGGCAAGAGCTCAAATTTGAAATCTGGCAC  
CTTCGGTGTCCGAGTTGTAATTTGTAGAAGCATCTTTTGGATTGGTCCTTGCATATG  
TTCCTTGGAACAGGACATCATAGAGGGTGAGAATCCCGTTCATGGTGGGGAATCC  
AATTCCTTTGTAAAGTGCTTTCGAAGAGTCGAGTTGTTTGGGAATGCAGCTCTAAGT  
GGGTGGTAAATTCCATCTAAAGCTAAATATTGGCGAGAGACCGATAGCGAACAA  
GTACAGTGATGGAAAGATGAAAAGAAGTCCGAAAGGAGAGTGAAAAAGGACGT  
GAAATTGTTGAAAGGGAAGTGCTTGAGATCAGTCTTAAGGTTTAGTGATCAGTCT  
TCCTTTTGGTTGGTGCACCTCACTATTTCTTAGGCCAACATCAGTTTTGGCGGCAGG  
ATAATGACATTGGAATGTGGCTCTTTCGGGAGTGTTATAGCCTTTGTTGATACTGC  
CTGCTTAGACTGAGGACTGCGCTTTTGCTAGGATGTTGGCATAATGA

**105. *Lipomyces tetrasporus* SWU-NGP 1-4**

>SWU-NGP 1-4 (551 bp)

CCTTAGTAACTGCGAGTGAAGCGGCAAGAGCTCAAATTTGAAATCTGGCACCTTC  
GGTGTCCGAGTTGTAATTTGTAGAAGCATCTTTTGGATTGGTCCTTGCATATGTTCC  
TTGGAACAGGACATCATAGAGGGTGAGAATCCCGTTCATGGTGGGGAATCCAAT  
TCTTTGTAAAGTGCTTTCGAAGAGTCGAGTTGTTTGGGAATGCAGCTCTAAGTGGG  
TGGTAAATTCCATCTAAAGCTAAATATTGGCGAGAGACCGATAGCGAACAAGTA  
CAGTGATGGAAAGATGAAAAGAAGTCCGAAAGGAGAGTGAAAAAGGACGTGAA  
ATTGTTGAAAGGGAAGTGCTTGAGATCAGTCTTAAGGTTTAGTGATCAGTCTTCCT  
TTTGGTTGGTGCACCTCACTATTTCTTAGGCCAACATCAGTTTTTCGCGGCAGGATAA  
TGACATTGGAATGTGGCTCTTTCGGGAGTGTTATAGCCTTTGTTGATACTGCCTGC  
TTAGACTGAGGACCGCGCTTTTGCTAGGATGTTGGCATAATGATCTTAAGCAGC

**106. *Lipomyces starkeyi* SWU-NGTP 4-6**

>SWU-NGTP 4-6 (544 bp)

GTAAGTGCAGTGAAGCGGCAAGAGCTCAAATTTGAAATCTGGCACCTTCGGTGT  
CCGAGTTGTAATTTGTAGAAGCATCTTTTGGATTGGTCCTTGCATATGTTTCCTTGGA  
ACAGGACATCATAGAGGGTGAGAATCCCGTTCATGGTGGGGAATCCAATTCTTTG  
TAAAGTGCTTTTCGAAGAGTCGAGTTGTTTGGGAATGCAGCTCTAAGTGGGTGGTA  
AATTCCATCTAAAGCTAAATATTGGCGAGAGACCGATAGCGAACAAGTACAGTG  
ATGGAAAGATGAAAAGAACTCCGAAAGGAGAGTGAAAAAGGACGTGAAATTGT  
TGAAAGGGAAGTGCTTGAGATCAGTCTTAAGGTTTAGTGATCAGTCTTCCTTTTGG  
TTGGTGCACCTCACTATTTCTTAGGCCAACATCAGTTTTGGCGGCAGGATAATGACA  
TTGGAATGTGGCTCTTTCGGGAGTGTTATAGCCTTTGTTGATACTGCCTGCTTAGA  
CTGAGGACTGCGCTTTTGCTAGGATGTTGGCATAATGATCTTAAGCA

**107. *Lipomyces tetrasporus* SWU-NGP 2-3**

>SWU-NGP 2-3 (524 bp)

GTAAGTGCAGTGAAGCGGCAAGAGCTCAAATTTGAAATCTGGCACCTTCGGTGT  
CCGAGTTGTAATTTGTAGAAGCATCTTTTGGATTGGTCCTTGCATATGTTTCCTTGGA  
ACAGGACATCATAGAGGGTGAGAATCCCGTTCATGGTGGGGAATCCAATTCTTTG  
TAAAGTGCTTTTCGAAGAGTCGAGTTGTTTGGGAATGCAGCTCTAAGTGGGTGGTA  
AATTCCATCTAAAGCTAAATATTGGCGAGAGACCGATAGCGAACAAGTACAGTG  
ATGGAAAGATGAAAAGAACTCCGAAAGGAGAGTGAAAAAGGACGTGAAATTGT  
TGAAAGGGAAGTGCTTGAGATCAGTCTTAAGGTTTAGTGATCAGTCTTCCTTTTGG  
TTGGTGCACCTCACTATTTCTTAGGCCAACATCAGTTTTCGCGGCAGGATAATGACA  
TTGGAATGTGGCTCTTTCGGGAGTGTTATAGCCTTTGTTGATACTGCCTGCTTAGA  
CTGAGGACCGCGCTTTTGCTAGGATGT

**108. *Lipomyces starkeyi* SWU-NGTP 4-11**

>SWU-NGTP 4-11 (534 bp)

GCCTTAGTAACTGCGAGTGAAGCGGCAAGAGCTCAAATTTGAAATCTGGCACCTT  
CGGTGTCCGAGTTGTAATTTGTAGAAGCATCTTTTGGATTGGTCCTTGCATATGTTT  
CTTGAACAGGACATCATAGAGGGTGAGAATCCCGTTCATGGTGGGGAATCCAA  
TTCTTTGTAAAGTGCTTTTCGAAGAGTCGAGTTGTTTGGGAATGCAGCTCTAAGTGG  
GTGGTAAATTCCATCTAAAGCTAAATATTGGCGAGAGACCGATAGCGAACAAGT  
ACAGTGATGGAAAGATGAAAAGAACTCCGAAAGGAGAGTGAAAAAGGACGTGA

AATTGTTGAAAGGGAAGTGCTTGAGATCAGTCTTAAGGTTTAGTGATCAGTCTTCC  
TTTTGGTTGGTGCACCTACTATTTCTTAGGCCAACATCAGTTTTGGCGGCAGGATA  
ATGACATTGGAATGTGGCTCTTTCGGGAGTGTTATAGCCTTTGTTGATACTGCCTG  
CTTAGACTGAGGACTGCGCTTTTGCTAGGATGTTGGC

**109. *Lipomyces tetrasporus* SWU-NGP 2-2**

>SWU-NGP 2-2 (540 bp)

GATTGCCTTAGTAACTGCGAGTGAAGCGGCAAGAGCTCAAATTTGAAATCTGGCA  
CCTTCGGTGTCCGAGTTGTAATTTGTAGAAGCATCTTTTGGATTGGTCCTTGCATAT  
GTTCTTTGGAACAGGACATCATAGAGGGTGAGAATCCCGTTCATGGTGGGGAATC  
CAATTCCTTTGTAAAGTGCTTTCGAAGAGTCGAGTTGTTTGGGAATGCAGCTCTAAG  
TGGGTGGTAAATTCCATCTAAAGCTAAATATTGGCGAGAGACCGATAGCGAACA  
AGTACAGTGATGGAAAGATGAAAAGAACTCCGAAAGGAGAGTGAAAAAGGACG  
TGAAATTGTTGAAAGGGAAGTGCTTGAGATCAGTCTTAAGGTTTAGTGATCAGTC  
TTCCTTTTGGTTGGTGCACCTACTATTTCTTAGGCCAACATCAGTTTTCGCGGCAGG  
ATAATGACATTGGAATGTGGCTCTTTCGGGAGTGTTATAGCCTTTGTTGATACTGC  
CTGCTTAGACTGAGGACCGCGCTTTTGCTAGGATGTTGGCAT

**110. *Lipomyces starkeyi* SWU-NGTP 4-5**

>SWU-NGTP 4-5 (532 bp)

GCCTTAGTAACTGCGAGTGAAGCGGCAAGAGCTCAAATTTGAAATCTGGCACCTT  
CGGTGTCCGAGTTGTAATTTGTAGAAGCATCTTTTGGATTGGTCCTTGCATATGTTC  
CTTGGAACAGGACATCATAGAGGGTGAGAATCCCGTTCATGGTGGGGAATCCAA  
TTCTTTGTAAAGTGCTTTCGAAGAGTCGAGTTGTTTGGGAATGCAGCTCTAAGTGG  
GTGGTAAATTCCATCTAAAGCTAAATATTGGCGAGAGACCGATAGCGAACAAGT  
ACAGTGATGGAAAGATGAAAAGAACTCCGAAAGGAGAGTGAAAAAGGACGTGA  
AATTGTTGAAAGGGAAGTGCTTGAGATCAGTCTTAAGGTTTAGTGATCAGTCTTCC  
TTTTGGTTGGTGCACCTACTATTTCTTAGGCCAACATCAGTTTTGGCGGCAGGATA  
ATGGCATTGGAATGTGGCTCTTTCGGGAGTGTTATAGCCTTTGTTGATACTGCCTG  
CTTAGACTGAGGACTGCGCTTTTGCTAGGATGTTG

**111. *Lipomyces starkeyi* SWU-NAPH 3-6**

>SWU-NAPH 3-6 (518 bp)

ACTGCGAGTGAAGCGGCAAGAGCTCAAATTTGAAATCTGGCACCTTCGGTGTCCG  
AGTTGTAATTTGTAGAAGCATCTTTTGGATTGGTCCTTGCATATGTTCCCTTGGAAC  
AGGACATCATAGAGGGTGAGAATCCCGTTCATGGTGGGGAATCCAATTCTTTGTA  
AAGTGCTTTTCGAAGAGTCGAGTTGTTTGGGAATGCAGCTCTAAGTGGGTGGTAAA  
TTCCATCTAAAGCTAAATATTGGCGAGAGACCGATAGCGAACAAGTACAGTGAT  
GGAAAGATGAAAAGAAGTCCGAAAGGAGAGTGAAAAAGGACGTGAAATTGTTG  
AAAGGGAAGTGCTTGAGATCAGTCTTAAGGTTTAGTGATCAGTCTTCCTTTTGGT  
GGTGCACCTCACTATTTCTTAGGCCAACATCAGTTTTTGGCGGCAGGATAATGACATT  
GGAATGTGGCTCTTTCGGGAGTGTTATAGCCTTTGTTGATACTGCCTGCTTAGACT  
GAGGACTGCGCTTTTGCTAGGA

**112. *Lipomyces starkeyi* SWU-NATP 2-6**

>SWU-NATP 2-6 (528 bp)

GCCTTAGTAACTGCGAGTGAAGCGGCAAGAGCTCAAATTTGAAATCTGGCACCTT  
CGGTGTCCGAGTTGTAATTTGTAGAAGCATCTTTTGGATTGGTCCTTGCATATGTTC  
CTTGGAACAGGACATCATAGAGGGTGAGAATCCCGTTCATGGTGGGGAATCCAA  
TTCTTTGTAAAGTGCTTTTCGAAGAGTCGAGTTGTTTGGGAATGCAGCTCTAAGTGG  
GTGGTAAATTCCATCTAAAGCTAAATATTGGCGAGAGACCGATAGCGAACAAGT  
ACAGTGATGGAAAGATGAAAAGAAGTCCGAAAGGAGAGTGAAAAAGGACGTGA  
AATTGTTGAAAGGGAAGTGCTTGAGATCAGTCTTAAGGTTTAGTGATCAGTCTTCC  
TTTTGGTTGGTGCACCTCACTATTTCTTAGGCCAACATCAGTTTTTGGCGGCAGGATA  
ATGGCATTGGAATGTGGCTCTTTCGGGAGTGTTATAGCCTTTGTTGATACTGCCTG  
CTTAGACTGAGGACTGCGCTTTTGCTAGGAT

**113. *Lipomyces starkeyi* SWU-NAP 8-1**

>SWU-NAP 8-1 (537 bp)

ATTGCCTTAGTAACTGCGAGTGAAGCGGCAAGAGCTCAAATTTGAAATCTGGCAC  
CTTCGGTGTCCGAGTTGTAATTTGTAGAAGCATCTTTTGGATTGGTCCTTGCATATG  
TTCCTTGGAACAGGACATCATAGAGGGTGAGAATCCCGTTCATGGTGGGGAATCC  
AATTCTTTGTAAAGTGCTTTTCGAAGAGTCGAGTTGTTTGGGAATGCAGCTCTAAGT  
GGGTGGTAAATTCCATCTAAAGCTAAATATTGGCGAGAGACCGATAGCGAACAA  
GTACAGTGATGGAAAGATGAAAAGAAGTCCGAAAGGAGAGTGAAAAAGGACGT

GAAATTGTTGAAAGGGAAGTGCTTGAGATCAGTCTTAAGGTTTAGTGATCAGTCT  
TCCTTTTGGTTGGTGCACCTCACTATTTCTTAGGCCAACATCAGTTTTGGCGGCAGG  
ATAATGACATTGGAATGTGGCTCTTTCGGGAGTGTTATAGCCTTTGTTGATACTGC  
CTGCTTAGACTGAGGACTGCGCTTTTGCTAGGATGTTGGC

**114. *Lipomyces starkeyi* SWU-NGTP 4-3**

>SWU-NGTP 4-3 (539 bp)

TGCCTTAGTAACCTGCGAGTGAAGCGGCAAGAGCTCAAATTTGAAATCTGGCACCT  
TCGGTGTCCGAGTTGTAATTTGTAGAAGCATCTTTTGGATTGGTCCTTGCATATGTT  
CCTTGAACAGGACATCATAGAGGGTGAGAATCCCGTTCATGGTGGGGAATCCA  
ATTCTTTGTAAAGTGCTTTCGAAGAGTCGAGTTGTTTGGGAATGCAGCTCTAAGTG  
GGTGGTAAATTCCATCTAAAGCTAAATATTGGCGAGAGACCGATAGCGAACAAG  
TACAGTGATGGAAAGATGAAAAGAACTCCGAAAGGAGAGTGAAAAAGGACGTG  
AAATTGTTGAAAGGGAAGTGCTTGAGATCAGTCTTAAGGTTTAGTGATCAGTCTT  
CCTTTTGGTTGGTGCACCTCACTATTTCTTAGGCCAACATCAGTTTTGGCGGCAGGA  
TAATGGCATTGGAATGTGGCTCTTTCGGGAGTGTTATAGCCTTTGTTGATACTGCC  
TGCTTAGACTGAGGACTGCGCTTTTGCTAGGATGTTGGCATAA

**115. *Lipomyces tetrasporus* SWU-NAP 4-1**

>SWU-NAP 4-1 (499 bp)

GCTCAATTTGAAATCTGGCACCTTCGGTGTCCGAGTTGTAATTTGTAGAAGCATCT  
TTTGGATTGGTCCTTGCATATGTTTCCTTGGAACAGGACATCATAGAGGGTGAGAA  
TCCCGTTCATGGTGGGGAATCCAATTCTTTGTAAAGTGCTTTCGAAGAGTCGAGTT  
GTTTGGGAATGCAGCTCTAAGTGGGTGGTAAATTCCATCTAAAGCTAAATATTGG  
CGAGAGACCGATAGCGAACAAGTACAGTGATGGAAAGATGAAAAGAACTCCGA  
AAGGAGAGTGAAAAAGGACGTGAAATTGTTGAAAGGGAAGTGCTTGAGATCAGT  
CTTAAGGTTTAGTGATCAGTCTTCCTTTTGGTTGGTGCACCTCACTATTTCTTAGGCC  
AACATCAGTTTTCGCGGCAGGATAATGACATTGGAATGTGGCTCTTTCGGGAGTG  
TTATAGCCTTTGTTGATACTGCCTGCTTAGACTGAGGACCGCGCTTTTGCTAGGAT  
GT

**116. *Hannaella* sp. SWU-NAPS 5-1**

>SWU-NAPS 5-1 (501 bp)

AATTTAAAATCTGGCGTCTTTCAGGCGTCCGAGTTGTAATCTACAGAAGTGTTTTTC  
CGTGCCCGGACCGTGTCCAAGTCCCTTGGAATAGGGTATCAAAGAGGGTGATAATC  
CCGTACTTGACACGACAACCGGTGCTCTGTGATACATTTTCTACGAGTCGAGTTGT  
TTGGGAATGCAGCTCAAAATGGGTGGTAAATTCCATCTAAAGCTAAATATAGGCG  
AGAGACCGATAGCGAACAAGTACCGTGAGGGAAAGATGAAAAGCACTTTGGAA  
AGAGAGTTAAACAGTACGTGAAATTGTTAAAAGGGAAACGATTGAAGTCAGTCA  
TGTCTATTGGTTTCAGCTAGCTCTGCTAGTGTATTACCTTTAGACGGGTCAACATC  
AGTTTTAGACGGTGGA AAAAGGCATGAGGAAAGTAGCAACTCCGGTTGTGTTAT  
AGCCTCGTGTTGCATACACTGTCCGAGACTGAGGAATGCAGCTCGCCTTTATGGC  
CGGGGT

**117. *Papiliotrema flavescens* SWU-NGTP 2-6**

>SWU-NGTP 2-6 (500 bp)

TGAAATCTGGCGTGCTCAGTGCGTCCGAGTTGTAATCTATAGAGTCGTTTTCCGTG  
CCGACTGTGTCCAAGTCCCTTGGAACAGGGTATCAAAGAGGGTGATAATCCCGT  
ACTTGACACAATGACCGGTGCTCTGTGATACGTCTTCTACGAGTCGAGTTGTTTGG  
GAATGCAGCTCAAAATGGGTGGTGAGTTCCATCTAAAGCTAAATATTGGCGAGA  
GACCGATAGCGAACAAGTACCGTGAGGGAAAGATGAAAAGCACTTTGGAAAGA  
GAGTTAAACAGTACGTGAAATTGTTAAAAGGGAAACGATTGAAGTCAGTCGTGA  
CTGAGAGGCTCAGCCGGTTCTGCCGGTGTATTCCCCTCAGTCGGGTCAACATCAG  
TTTTGTTCCGGTGGATAAGGGCAGTTGGAAGGTGGCACCTCGGGTGTGTTATAGC  
CAGCTGTCGCATACATCGGATGAGACTGAGGAATGCAGCTCGCCTTTATGGCCGG  
GGTTCGC

**118. *Cyberlindnera saturnus* SWU-NGTP 4-12-2**

>SWU-NGTP 4-12-2 (548 bp)

CTCAGTAACGGCGAGTGAAGCGGCAAAAGCTCAAATTTGAAATCTGGTACCTTTG  
GTGCCCCGAGTTGTAATTTGAAGATAGTTTTCTGGTGCTGGCCCTTGTCTATGTTTCT  
TGGAACAGGACGTCACAGAGGGTGAGAATCCCGTCTGGCGGGGTGTCCAGTGCT  
TTGTAGATTTCTATCGACGAGTCGAGTTGTTTGGGAATGCAGCTCTAAGTGGGTGG  
TAAATTCCATCTAAAGCTAAATATTGGCGAGAGACCGATAGCGAACAAGTACAG  
TGATGGAAAGATGAAAAGAACTTTGAAAAGAGAGTGAAAAAGTACGTGAAATT



GTTGAAAGGGAAGGGTATTAGATCAGACTTGGTGT TTTGTGATTATCTTCCCTTCT  
TGGGTTGTGCACTCGCATTTCACTGGGCCAGCATCGGTTCCGGGTGGTAAGATAAT  
GACATTGGAACGTGGCACTACCTTCGGGTGGTGTGTTATAGCCCTTGTTGATGTTG  
CCTACCTGGACCGAGGACTGCGGCTTTTGCCTAGGATGCTGGCGTAATGATC

**119. *Cyberlindnera saturnus* SWU-NGTP 5-3-3**

>SWU-NGTP 5-3-3 (484 bp)

CTGGTACCTTTGGTGCCCCGAGTTGTAATTTGAAGATAGTTTTCTGGTGCTGGCCCTT  
GTCTATGTTCCCTTGGAACAGGACGTCACAGAGGGTGAGAATCCCGTCTGGCGGGG  
TGTCAGTGCTTTGTAGATTTCTATCGACGAGTCGAGTTGTTTGGGAATGCAGCTC  
TAAGTGGGTGGTAAATTCCATCTAAAGCTAAATATTGGCGAGAGACCGATAGCG  
AACAAAGTACAGTGATGGAAAGATGAAAAGAACTTTGAAAAGAGAGTGAAAAAG  
TACGTGAAATTGTTGAAAGGGAAGGGTATTAGATCAGACTTGGTGT TTTGTGATT  
ATCTTCCCTTCTTGGGTTGTGCACTCGCATTTCACTGGGCCAGCATCGGTTCCGGT  
GGTAAGATAATGACATTGGAACGTGGCACTACCTTCGGGTGGTGTGTTATAGCCC  
TTGTTGATGTTGCCTACCTGGACCGAGGACTGCGGCTTTTGCC

**120. *Saitozyma podzolica* SWU-NGP 5-3-8**

>SWU-NGP 5-3-8 (496 bp)

TTTGAAAGCTGGCGTCCTACGGGCGTCCGCATTGTAATCTATAGAGGCGTTTTCTG  
TGCTGGACCGTGTCCAAGTCCCTTGGAACAGGGTATCAAAGAGGGTGACAATCC  
CGTACTTGACACGACAACCAAGTGCTCTGTGATACGTCTTCTACGAGTCGAGTTGTT  
TGGGAATGCAGCTCAAAATGGGTGGTGAATTCCATCTAAAGCTAAATATTGGCGA  
GAGACCGATAGCGAACAAGTACCGTGAGGGAAAGATGAAAAGCACTTTGGAAA  
GAGAGTTAAACAGTATGTGAAATTGTTGAAAGGGAAACGATGGAGGTCAGTCGT  
GTCTGTGGGATTCAGCCGTCTCTGGCGGTGTACTTCCCACAGACGGGTCAACATC  
AGTTTTGGCTGGCGGATAAAGGCAGGAGGAAGGTGGCACCCCCGGGTGTGTTAT  
AGCCTCTTGTTGCATACGCTGGCTGAGACTGAGGAATGCAGCTCGCCTTTATGGC  
CGGG

**121. *Piskurozyma* sp. SWU-NGP 14-3-4**

>SWU-NGP 14-3-4 (583 bp)

TTCCCCTAGTAACGGCGAGTGAAGCGGGAAGAGCTCAAATTTGAAATCTGGCGC  
CCTCAGGACGTCCGAGTTGTAATCTATAGGAACGTTTTCCGTGCCGGCTCATGTAC

AAGTCCCTTGGAACAGGGCGTCATAGAGGGTGAGAATCCCGTACTTGACATGAA  
CCCCCGGTGCTCTGTGATACGTCTCCAACGAGTCGAGTTGTTTGGGAATGCAGCTC  
AAAATGGGTGGTAAATTCCATCTAAAGCTAAATATTGGTGTGAGACCGATAGCG  
AACAAAGTACCGTGAGGGAAAGATGAAAAGCACTTTGGAAAGAGAGTTAAAAAG  
TATGTGAAATTGTTGAAAGGGAAACGATTGAAGTCAGTCGTGTCCTTCAGATTCA  
GCTGGTTCTGCCGGTGTATTTCTGTTGGATGGGGTCAACATCAGTTTCGGATGCCG  
GATAAGGGCTGGAGGAAGGTAGTACCCCCGGGTAACTTATAGCCTCCTGTCGC  
ATACGGTGACTGGGACTGAGGAACGCAGCTTGCCTTCATGGCCGGGGTTCGCCCCA  
CGTACAAGCTTAGGATGTTGACATAATGGCTTTAAA

**122. *Papiliotrema flavescens* SWU-NGTP 4-1**

>SWU-NGTP 4-1 (480 bp)

GAAATCTGGCGTGCTCAGTGCGTCCGAGTTGTAATCTATAGAGTCGTTTTCCGTGC  
CGGACTGTGTCCAAGTCCCTTGGAACAGGGTATCAAAGAGGGTGATAATCCCGTA  
CTTGACACAATGACCGGTGCTCTGTGATACGTCTTCTACGAGTCGAGTTGTTTGGG  
AATGCAGCTCAAAATGGGTGGTGAGTTCCATCTAAAGCTAAATATTGGCGAGAG  
ACCGATAGCGAACAAGTACCGTGAGGGAAAGATGAAAAGCACTTTGGAAAGAG  
AGTTAAACAGTACGTGAAATTGTTAAAAGGGAAACGATTGAAGTCAGTCGTGAC  
TGAGAGGCTCAGCCGGTTCTGCCGGTGTATTTCCCTCAGTCGGGTCAACATCAGTT  
TTGTTCCGGTGGATAAGGGCAGTTGGAAGGTGGCACCCCTCGGGTGTGTTATAGCCA  
GCTGTGTCATACATCGGATGAGACTGAGGAATGCAGCTCGC

**123. *Saitozyma podzolica* SWU-NGP 14-2-2**

>SWU-NGP 14-2-2 (481 bp)

GGGAAGAGCTCAAATTTGAAAGCTGGCGTCCTACGGGCGTCCGCATTGTAATCTA  
TAGAGGCGTTTTCTGTGCTGGACCGTGTCCAAGTCCCTTGGAACAGGGTATCAA  
GAGGGTGACAATCCCGTACTTGACACGACAACCAGTGCTCTGTGATACGTCTTCT  
ACGAGTCGAGTTGTTTGGGAATGCAGCTCAAAATGGGTGGTGAATTCCATCTAAA  
GCTAAATATTGGCGAGAGACCGATAGCGAACAAGTACCGTGAGGGAAAGATGA  
AAAGCACTTTGGAAAGAGAGTTAAACAGTATGTGAAATTGTTGAAAGGGAAACG  
ATGGAGGTCAGTCGTGTCTGTGGGATTCAGCCGTCTCGGCGGTGTACTTCCCACA  
GACGGGTCAACATCAGTTTTGGCTGGCGGATAAAGGCAGGAGGAAGGTGGCACC  
CCCGGGTGTGTTATAGCCTCTTGTTGCATACGCTGGCTGAGACTG

**124. *Piskurozyma* sp. SWU-NGP 14-3-2**

>SWU-NGP 14-3-2 (517 bp)

CCTAGTAACGGCGAGTGAAGCGGGAAGAGCTCAAATTTGAAATCTGGCGCCCTC  
AGGACGTCCGAGTTGTAATCTATAGGAACGTTTTCCGTGCCGGCTCATGTACAAG  
TCCCTTGGAACAGGGCGTCATAGAGGGTGAGAATCCCGTACTTGACATGAACCCC  
CGGTGCTCTGTGATACGTCTCCAACGAGTCGAGTTGTTTGGGAATGCAGCTCAAA  
ATGGGTGGTAAATTCCATCTAAAGCTAAATATTGGTGTGAGACCGATAGCGAACA  
AGTACCGTGAGGGAAAGATGAAAAGCACTTTGGAAAGAGAGTTAAAAAGTATGT  
GAAATTGTTGAAAGGGAAACGATTGAAGTCAGTCGTGTCCTTCAGATTCAGCTGG  
TTCTGCCGGTGTATTTCTGTTGGATGGGGTCAACATCAGTTTCGGATGCCGGATAA  
GGGCTGGAGGAAGGTAGTACCCCCGGGTAAACTTATAGCCTCCTGTCTGCATACGG  
TGA CTGGGACTGAGGAACGCAG

**125. *Meyerozyma guilliermondii* SWU-NATP 2-4**

>SWU-NATP 2-4 (442 bp)

AGTGAAGCGGCAAAAGCTCAAATTTGAAATCTGGCGCCTTCGGTGTCCGAGTTGT  
AATTTGAAGATTGTAACCTTGGGGTTGGCTCTTGTCTATGTTTCTTGGAACAGGAC  
GTCACAGAGGGTGAGAATCCCGTGCGATGAGATGCCCAATTCTATGTAAGGTGCT  
TTCGAAGAGTCGAGTTGTTTGGGAATGCAGCTCTAAGTGGGTGGTAAATTCCATC  
TAAAGCTAAATATTGGCGAGAGACCGATAGCGAACAAGTACAGTGATGGAAAG  
ATGAAAAGAACTTTGAAAAGAGAGTGAAAAAGTACGTGAAATTGTTGAAAGGG  
AAGGGTTTGAGATCAGACTCGATATTTTGTGAGCCTTGCCTTCGTGGCGGGGTGA  
CCCGCAGCTTATCGGGCCAGCATCGGTTTGGGCGGTAGGATAATGGCGTAGGAAT  
GTGAC

**126. *Saitozyma podzolica* SWU-NGP 14-2-2**

>SWU-NGP 14-2-2 (505 bp)

AGCTCAAATTTGAAAGCTGGCGTCCTACGGGCGTCCGCATTGTAATCTATAGAGG  
CGTTTTCTGTGCTGGACCGTGTCCAAGTCCCTTGGAACAGGGTATCAAAGAGGGT  
GACAATCCCGTACTTGACACGACAACCAGTGCTCTGTGATACGTCTTCTACGAGT  
CGAGTTGTTTGGGAATGCAGCTCAAAATGGGTGGTGAATTCCATCTAAAGCTAAA  
TATTGGCGAGAGACCGATAGCGAACAAGTACCGTGAGGGAAAGATGAAAAGCA  
CTTTGGAAAGAGAGTTAAACAGTATGTGAAATTGTTGAAAGGGAAACGATGGAG  
GTCAGTCGTGTCTGTGGGATTACAGCCGTCTCTGGCGGTGTACTTCCCACAGACGG  
GTCAACATCAGTTTTGGCTGGCGGATAAAGGCAGGAGGAAGGTGGCACCCCCGG

GTGTGTTATAGCCTCTTGTTGCATACGCTGGCTGAGACTGAGGAATGCAGCTCGC  
CTTTATGGCCGGGG

**127. *Papiliotrema flavescens* SWU-NATP 3-3**

>SWU-NATP 3-3 (484 bp)

ATTTGAAATCTGGCGTGCTCAGTGCGTCCGAGTTGTAATCTATAGAGTCGTTTTCC  
GTGCCGGACTGTGTCCAAGTCCCTTGGAACAGGGTATCAAAGAGGGTGATAATCC  
CGTACTTGACACAATGACCGGTGCTCTGTGATACGTCTTCTACGAGTCGAGTTGTT  
TGGGAATGCAGCTCAAAATGGGTGGTGAGTTCCATCTAAAGCTAAATATTGGCGA  
GAGACCGATAGCGAACAAGTACCGTGAGGGAAAGATGAAAAGCACTTTGGAAA  
GAGAGTTAAACAGTACGTGAAATTGTTAAAAGGGAAACGATTGAAGTCAGTCGT  
GACTGAGAGGCTCAGCCGGTTCTGCCGGTGTATTCCCCTCAGTCGGGTCAACATC  
AGTTTTGTTCCGTGGATAAGGGCAGTTGGAAGGTGGCACCTCGGGTGTGTTATA  
GCCAGCTGTTCGCATACATCGGATGAGACTGAGGAATGCAGCTCGC
